# Supplementary material
Source: publisher site journal article supplement (https://www.dovepress.com/article/585325)
Supplement: Supplementary file 1 [file 585325_p38Alpha_VillaPharma_SI_1.pdf]

# Computational Discovery and Optimization of a Potent, Selective, and Drug-like Scaffold for p38 $\alpha$ Inhibition

Jochem Nelen<sup>1,2</sup>, Márcia Inês Goettert<sup>3</sup>, Michael Forster<sup>3</sup>, Laure Breuils<sup>4</sup>, José Manuel Villalgordo-Soto<sup>5</sup>, Stefan Laufer<sup>3,\*</sup> and Horacio Pérez-Sánchez<sup>1,\*</sup>

<sup>1</sup>Structural Bioinformatics and High Performance Computing Research Group (BIO-HPC), UCAM HiTech, Universidad Católica de Murcia UCAM, Guadalupe, Murcia, 30107, Spain

<sup>2</sup>Health Sciences PhD Program, Universidad Católica de Murcia UCAM, Guadalupe, Murcia, 30107, Spain

<sup>3</sup>Department of Pharmaceutical/Medicinal Chemistry, Eberhard Karls University Tübingen, Tübingen, 72076, Germany

<sup>4</sup>Eurofins-Cerep S.A., Celle-Lévescault, 86600, France

<sup>5</sup>Eurofins-Villapharma Research, 30320 Murcia, Spain

\* Email: [stefan.laufer@uni-tuebingen.de](mailto:stefan.laufer@uni-tuebingen.de)

\* Email: [hperez@ucam.edu](mailto:hperez@ucam.edu)

# Table of Contents

|                                                             |     |
|-------------------------------------------------------------|-----|
| Experimental Details.....                                   | S3  |
| Chemical Synthesis .....                                    | S3  |
| Representative Synthesis of Compound <b>26</b> .....        | S3  |
| Supporting Analytical Data for Key Compounds .....          | S7  |
| Compound <b>26</b> .....                                    | S7  |
| Compound <b>28</b> .....                                    | S9  |
| Compound <b>47</b> .....                                    | S11 |
| Compound <b>48</b> .....                                    | S13 |
| Compound <b>50</b> .....                                    | S15 |
| Compound <b>53</b> .....                                    | S17 |
| ADMET Characterization .....                                | S19 |
| Protein Binding.....                                        | S19 |
| Aqueous Solubility.....                                     | S19 |
| Partition Coefficient (LogD).....                           | S19 |
| Caco-2 Permeability .....                                   | S19 |
| Half-life in Human Plasma .....                             | S19 |
| Intrinsic Clearance.....                                    | S20 |
| CYP3A Inhibition .....                                      | S20 |
| Kinase Selectivity Assay .....                              | S20 |
| Full MolSHAP Analysis of Substituent Contributions.....     | S22 |
| Full ADME Profiling Data of Key Compounds .....             | S29 |
| Full KINOMEScan Binding Profile of Compound <b>26</b> ..... | S36 |

# Experimental Details

## Chemical Synthesis

### Representative Synthesis of Compound 26

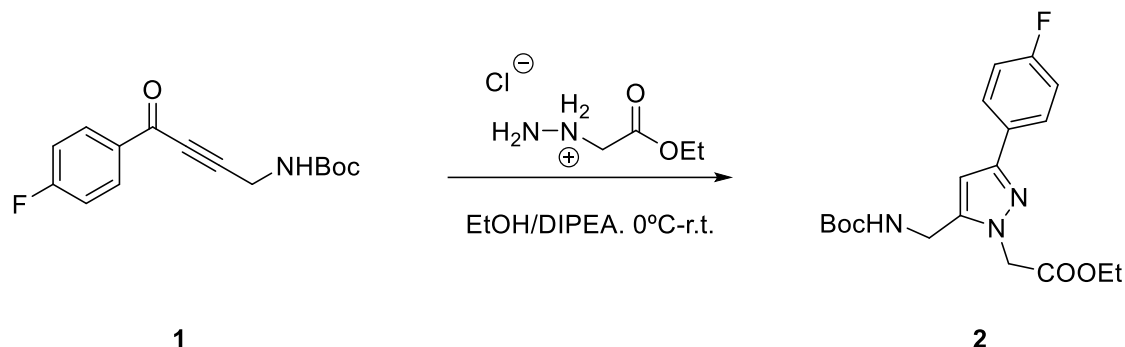

To a cooled (0°C) solution of the acetylenic ketone **1** (5 grs., 18.0 mmol) and the corresponding hydrazine hydrochloride (1.05 eq., 3.15 grs., 18.93 mmol) in EtOH (55 mL), DIPEA (1.05 eq., 18.93 mmol, 3.262 mL) was slowly added over a period of 1 hr. The reaction mixture was stirred at 0°C for 3 hr. The mixture is allowed to warm up to r.t. and further stirred for 2 hr. until total completion (TLC monitoring). The reaction mixture was concentrated under reduced pressure. The crude residue was partitioned between CH<sub>2</sub>Cl<sub>2</sub> and Brine. The layers were separated, and the organic layer dried over MgSO<sub>4</sub>, filtered and filtered through a plug of Celite/SiO<sub>2</sub>. Evaporation under reduced pressure of CH<sub>2</sub>Cl<sub>2</sub> afforded crude product **2** (6.336 grs., 93% yield) that was used in the next step without further purification.

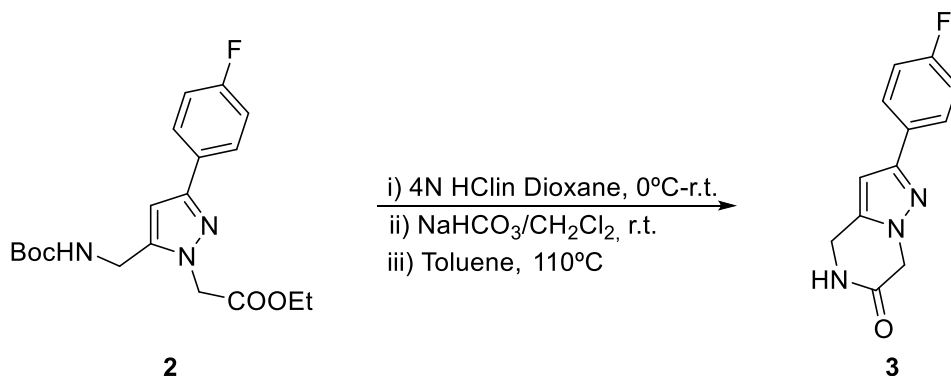

To pyrazole **2** (6.336 grs., 16.79 mmol), 50 mL of 4N HCl (in Dioxane) were added at r.t. The reaction mixture was stirred at r.t. overnight. Upon completion (TLC monitoring), the reaction mixture was concentrated under reduced pressure. The residue was partitioned between AcOEt and sat. solution of NaHCO<sub>3</sub>. The layers were separated. The organic layer was washed with brine and separated. The organic layer was dried over MgSO<sub>4</sub>, filtered and evaporated under reduced pressure. The resulting residue was diluted in toluene (50 mL) and refluxed for 2 hr. until cyclization was completed. Upon evaporation of the residue, the resulting residue was precipitated with toluene/MTBE to afford to a white solid **3** that was filtered and dried (2.64 gr., 68% yield)

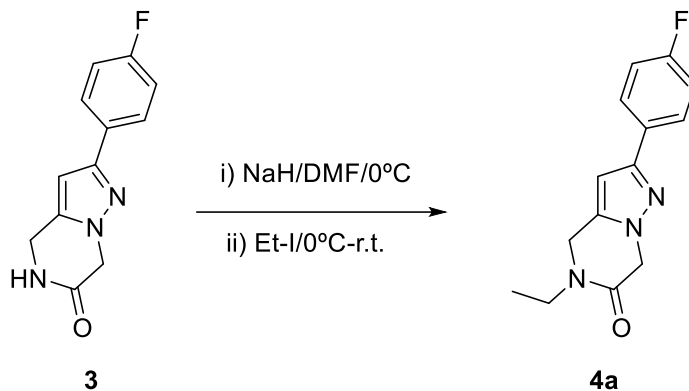

To a cooled (0°C) solution of **3** (3.1 gr., 13.41 mmol) in DMF (40 mL) NaH (1.50 eq., 20.12 mmol, 1.29 gr.) were added portionwise. The mixture was stirred at 0°C for 15 min. Ethyl iodide (1.20 eq., 16.09 mmol, 1.29 mL) were added dropwise. The reaction mixture was further stirred at r.t. overnight. Upon completion (TLC monitoring), H<sub>2</sub>O (50 mL) was carefully added, and the mixture extracted with AcOEt (3x50 mL). The combined organic layers were dried over MgSO<sub>4</sub>, filtered and concentrated under reduced pressure. The resulting residue was filtered through a short column of SiO<sub>2</sub> using CH<sub>2</sub>Cl<sub>2</sub>/MeOH mixtures to afford **4a** as a white solid (2.75 gr., 76% yield) that was used in the next step without further purification

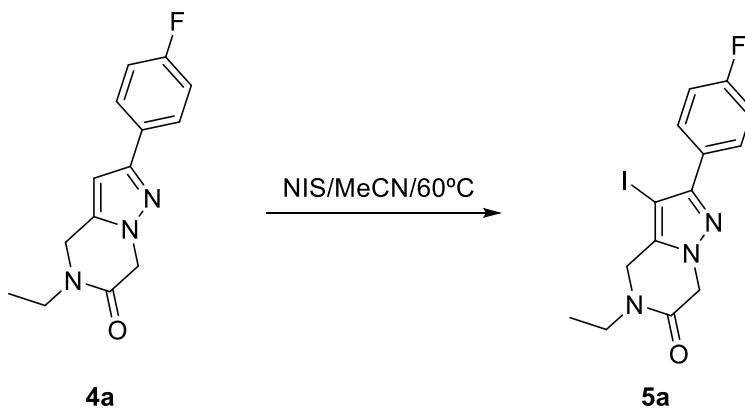

Compound **4a** (2.400 gr., 9.26 mmol) was dissolved in MeCN (100 mL), and protected from light. To this solution, NIS (2.20 eq., 20.37 mmol, 4.58 gr.) was added portionwise, and then allowed to react at 60°C for 16 hr. The solvent was evaporated and the residue filtered through a short column of SiO<sub>2</sub> (heptane/AcOEt mixtures) to afford **5a** (2.66 gr., 75% yield) as light yellow solid.

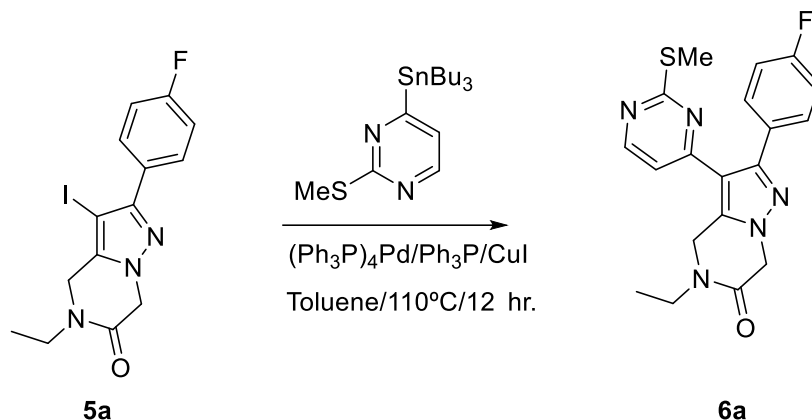

Compound **5a** (3.5 gr., 9.09 mmol), CuI (0.20 eq., 1.82 mmol, 347 mg), and PPh<sub>3</sub>P (0.1 eq., 0.91 mmol, 240 mg) were dissolved in dry toluene (30 mL). A gentle stream of N<sub>2</sub> was passed through for 5 min. Then, tetrakis(triphenylphosphine)palladium (0.1 eq., 0.91 mmol, 1.052 gr.) was incorporated and the reaction mixture allowed to react at 110°C with good stirring overnight. Upon completion, H<sub>2</sub>O (50 mL) were added and the mixture extracted with CH<sub>2</sub>Cl<sub>2</sub> (3x40 mL). The combined organic layers were dried over MgSO<sub>4</sub>, filtered and concentrated under reduced pressure. The resulting residue was filtered through a short column of SiO<sub>2</sub> (heptane/AcOEt mixtures) to afford **6a** (1.92 gr., 55% yield) as light brown solid.

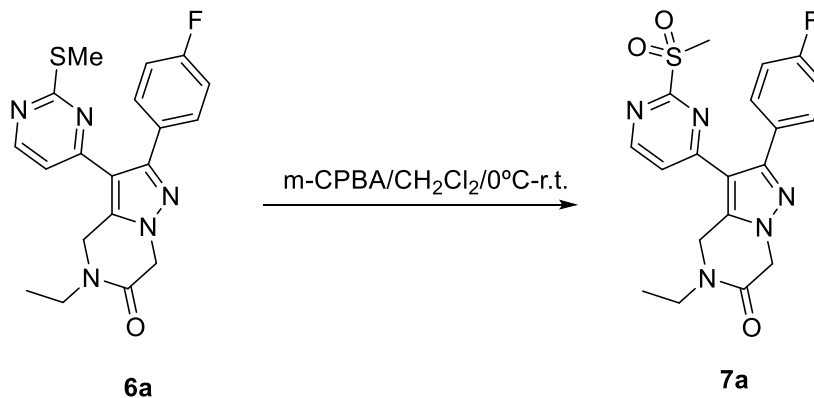

To a cooled (0°C) solution of **6a** (1.8 gr., 4.69 mmol) in CH<sub>2</sub>Cl<sub>2</sub> 50 mL), m-CPBA (2.80 eq., 13.13 mmol, 2.27 gr.), was added portion wise. The mixture was stirred from 0°C until r.t. overnight. Sat. Soln. of NaHCO<sub>3</sub> (50 mL) were added and the mixture extracted with CH<sub>2</sub>Cl<sub>2</sub> (3x30 mL). The combined organic layers were dried over MgSO<sub>4</sub>, filtered and concentrated under reduced pressure. The resulting residue was filtered through a short column of SiO<sub>2</sub> (CH<sub>2</sub>Cl<sub>2</sub>/MeOH mixtures) to afford **7a** (1.450 gr., 74% yield) as a yellow foam, that was used directly in the next step.

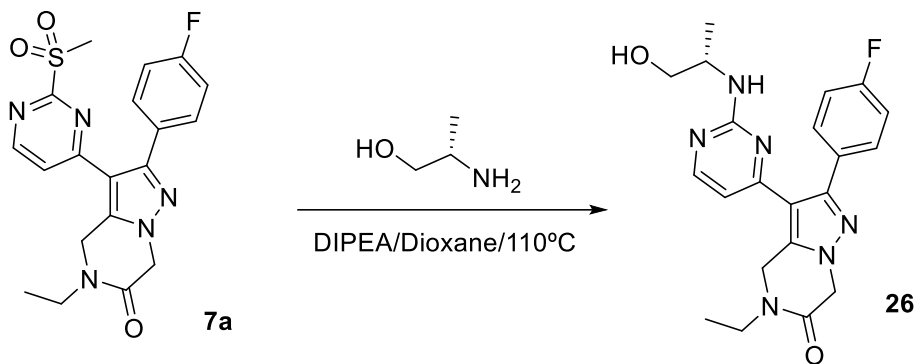

Sulfonyl derivative **7a** (750 mg, 1.81 mmol), amino alcohol (4 eq., 7.24 mmol, 0.57 mL) and DIPEA (4 eq., 7.24 mmol, 1.293 mL) were taken up in dioxane (10 mL). The mixture was stirred at 110°C overnight. Due to uncompletion, 2 additional eq. of amino alcohol and DIPEA were added and the mixture was stirred for additional 16 hr. Sat. solution of  $\text{NH}_4\text{Cl}$  was added and the mixture was extracted with EtOAc (3x15 mL). The combined organic layers were dried over  $\text{MgSO}_4$ , filtered and evaporated under reduced pressure. The resulting was purified through MPLC on  $\text{SiO}_2$  ( $\text{CH}_2\text{Cl}_2/\text{MeOH}$ ) affording targeted compound **26** (420 mg, 57% Yield) as white solid.

## Supporting Analytical Data for Key Compounds

### Compound 26

#### (S)-5-ethyl-2-(4-fluorophenyl)-3-(2-((1-hydroxypropan-2-yl)amino)pyrimidin-4-yl)-4,5-dihydropyrazolo[1,5-a]pyrazin-6(7H)-one

$^1\text{H}$  NMR (400 MHz,  $\text{DMSO-}d_6$ )  $\delta$  ppm 8.02 - 8.07 (m, 1 H), 7.46 - 7.52 (m, 2 H), 7.23 - 7.31 (m, 2 H), 6.76 - 6.81 (m, 1 H), 6.11 (d,  $J=5.15$  Hz, 1 H), 4.91 - 4.97 (m, 2 H), 4.81 - 4.86 (m, 2 H), 4.68 - 4.72 (m, 1 H), 3.91 - 4.02 (m, 1 H), 3.47 - 3.55 (m, 2 H), 3.32 - 3.37 (m, 1 H), 1.13 - 1.19 (m, 6 H).  $[\text{M}+\text{H}]^+ = 411.15$ , calculated exact mass for  $\text{C}_{21}\text{H}_{24}\text{FN}_6\text{O}_2 = 411.19$ ; purity 96%;  $t_{\text{R}} = 2.162$  min.

$^1\text{H}$  NMR (400 MHz,  $\text{DMSO-}d_6$ )  $\delta$  ppm 8.02 - 8.07 (m, 1 H), 7.46 - 7.52 (m, 2 H), 7.23 - 7.31 (m, 2 H), 6.76 - 6.81 (m, 1 H), 6.11 (d,  $J=5.15$  Hz, 1 H), 4.91 - 4.97 (m, 2 H), 4.81 - 4.86 (m, 2 H), 4.68 - 4.72 (m, 1 H), 3.91 - 4.02 (m, 1 H), 3.47 - 3.55 (m, 2 H), 3.32 - 3.37 (m, 1 H), 1.13 - 1.19 (m, 6 H)

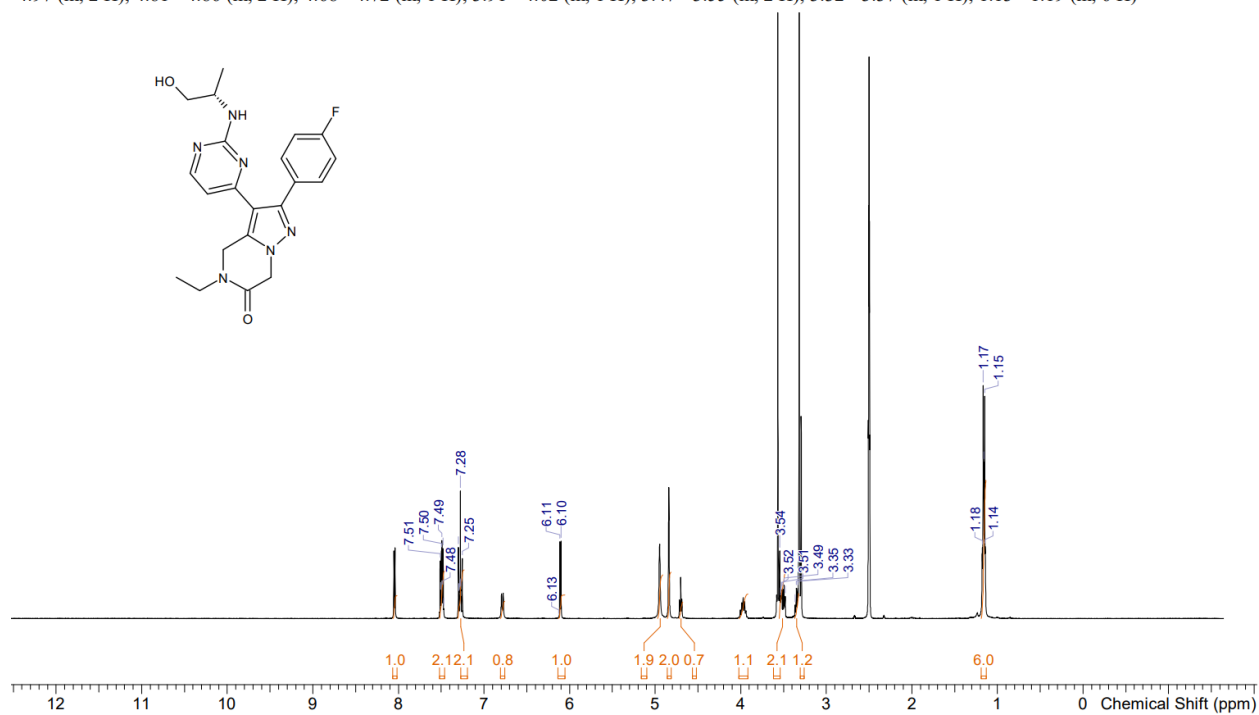

Figure S1.A  $^1\text{H}$  NMR (400 MHz,  $\text{DMSO-}d_6$ ) spectra of Compound 26.

### Sample Chromatograms

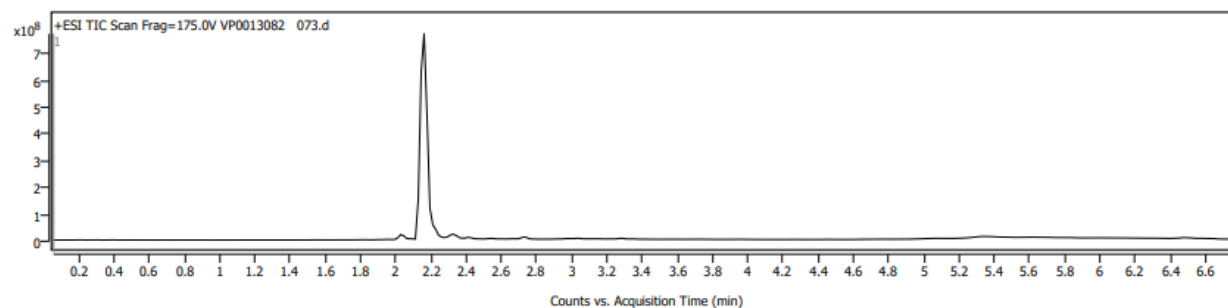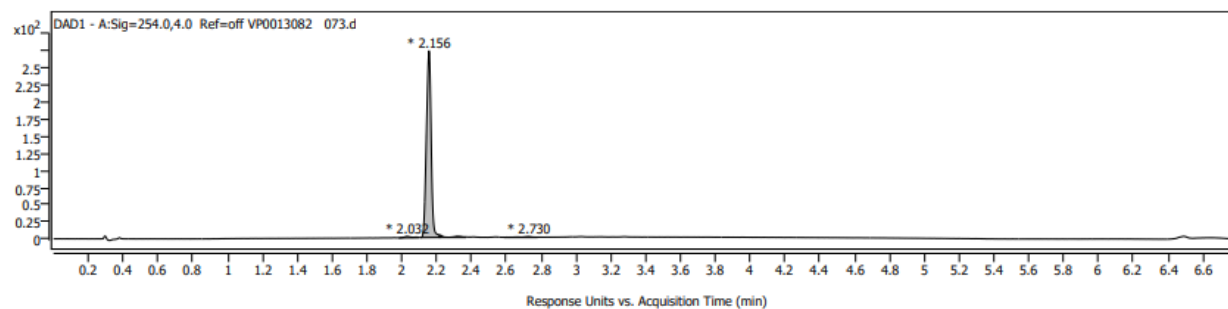

#### Chromatogram Peaks

| Peak | Start | RT    | End   | Height | Area | Area Sum % |
|------|-------|-------|-------|--------|------|------------|
| 1    | 1.986 | 2.032 | 2.092 | 2      | 6    | 1.15       |
| 2    | 2.108 | 2.156 | 2.216 | 273    | 515  | 96.03      |
| 3    | 2.218 | 2.220 | 2.364 | 3      | 9    | 1.71       |
| 4    | 2.591 | 2.730 | 2.775 | 1      | 6    | 1.11       |

### Sample Spectra

#### + Scan (rt: 2.162 min)

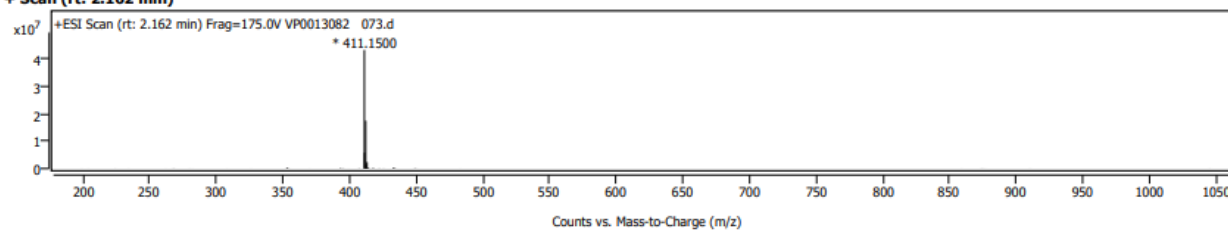

#### Spectrum Peaks

| m/z      | Z | Abund    | Abund % | m/z (Calc) | Diff (ppm) | Ion Species | Formula | Ion Type |
|----------|---|----------|---------|------------|------------|-------------|---------|----------|
| 411.1500 | 1 | 43319904 | 100.00  |            |            |             |         |          |
| 411.3192 | 1 | 5771208  | 13.32   |            |            |             |         |          |
| 412.1470 | 1 | 17504536 | 40.41   |            |            |             |         |          |
| 412.3218 | 1 | 1414774  | 3.27    |            |            |             |         |          |
| 413.1486 | 1 | 2361351  | 5.45    |            |            |             |         |          |

Figure S1.B LC-MS spectra for Compound 26.

## Compound 28

### (S)-2-(4-fluorophenyl)-3-(2-((1-hydroxypropan-2-yl)amino)pyrimidin-4-yl)-5-propyl-4,5-dihydropyrazolo[1,5-a]pyrazin-6(7H)-one

$^1\text{H}$  NMR (400 MHz,  $\text{DMSO-}d_6$ )  $\delta$  ppm 8.01 - 8.06 (m, 1 H), 7.45 - 7.52 (m, 2 H), 7.24 - 7.31 (m, 2 H), 6.78 (br d,  $J=8.01$  Hz, 1 H), 6.11 (d,  $J=5.15$  Hz, 1 H), 4.95 (br s, 2 H), 4.85 (s, 2 H), 3.92 - 4.00 (m, 1 H), 3.45 - 3.52 (m, 3 H), 1.62 (sxt,  $J=7.38$  Hz, 2 H), 1.15 (d,  $J=6.68$  Hz, 3 H), 0.89 (t,  $J=7.39$  Hz, 3 H).  $[\text{M}+\text{H}]^+ = 425.16$ , calculated exact mass for  $\text{C}_{22}\text{H}_{26}\text{FN}_6\text{O}_2 = 425.21$ ; purity 95%;  $t_{\text{R}} = 2.325$  min.

$^1\text{H}$  NMR (400 MHz,  $\text{DMSO-}d_6$ )  $\delta$  ppm 8.01 - 8.06 (m, 1 H), 7.45 - 7.52 (m, 2 H), 7.24 - 7.31 (m, 2 H), 6.78 (br d,  $J=8.01$  Hz, 1 H), 6.11 (d,  $J=5.15$  Hz, 1 H), 4.95 (br s, 2 H), 4.85 (s, 2 H), 3.92 - 4.00 (m, 1 H), 3.45 - 3.52 (m, 3 H), 1.62 (sxt,  $J=7.38$  Hz, 2 H), 1.15 (d,  $J=6.68$  Hz, 3 H), 0.89 (t,  $J=7.39$  Hz, 3 H)

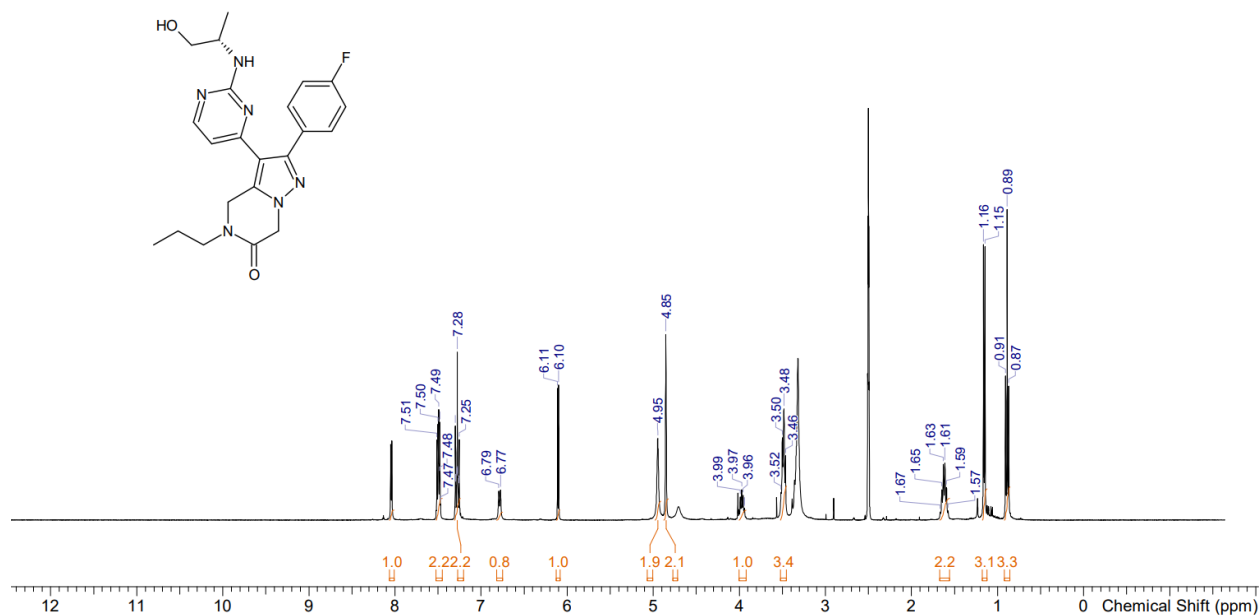

Figure S2.A  $^1\text{H}$  NMR (400 MHz,  $\text{DMSO-}d_6$ ) spectra of Compound 28.

### Sample Chromatograms

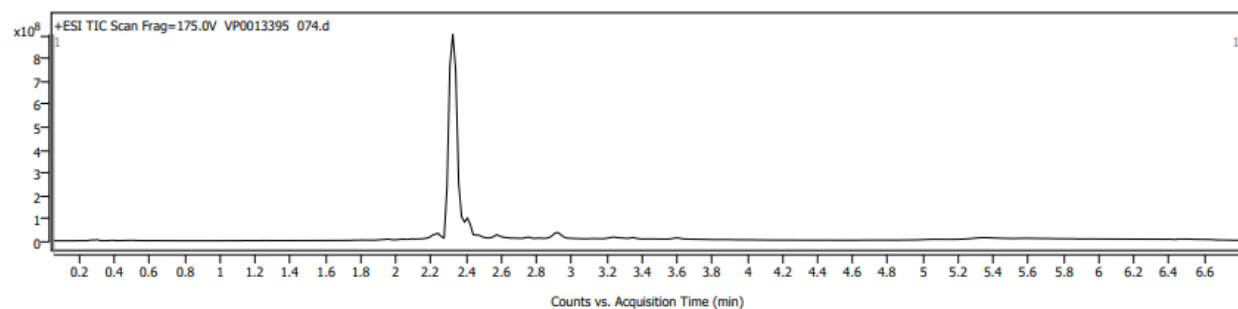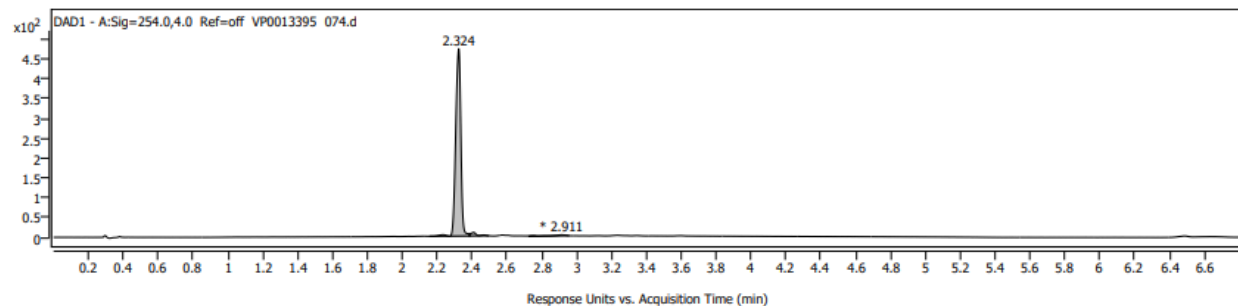

#### Chromatogram Peaks

| Peak | Start | RT    | End   | Height | Area | Area Sum % |
|------|-------|-------|-------|--------|------|------------|
| 1    | 2.157 | 2.233 | 2.270 | 4      | 11   | 1.10       |
| 2    | 2.273 | 2.324 | 2.386 | 473    | 959  | 94.78      |
| 3    | 2.386 | 2.409 | 2.497 | 9      | 22   | 2.17       |
| 4    | 2.727 | 2.911 | 2.957 | 3      | 20   | 1.95       |

### Sample Spectra

#### + Scan (rt: 2.325 min)

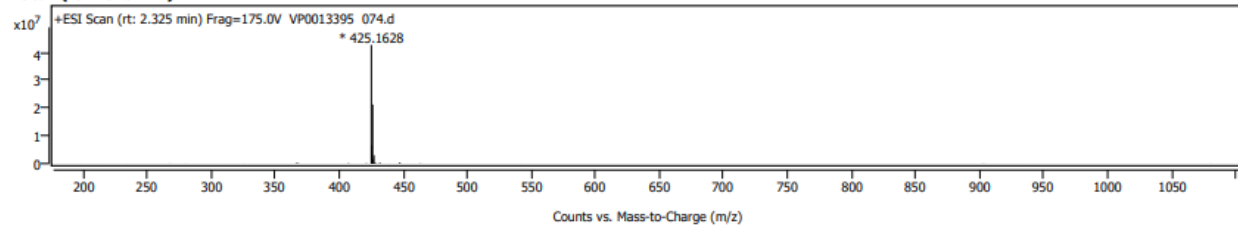

#### Spectrum Peaks

| m/z      | Z | Abund    | Abund % | m/z (Calc) | Diff (ppm) | Ion Species | Formula | Ion Type |
|----------|---|----------|---------|------------|------------|-------------|---------|----------|
| 425.1628 | 1 | 42616120 | 100.00  |            |            |             |         |          |
| 425.3327 | 1 | 6530169  | 15.32   |            |            |             |         |          |
| 426.1576 | 1 | 21190336 | 49.72   |            |            |             |         |          |
| 426.3334 | 1 | 1681772  | 3.95    |            |            |             |         |          |
| 427.1588 | 1 | 2983364  | 7.00    |            |            |             |         |          |

Figure S2.B LC-MS spectra for Compound 28.

## Compound 47

### (S)-2-(4-fluorophenyl)-3-(2-((1-phenylethyl)amino)pyrimidin-4-yl)-4,5-dihydropyrazolo[1,5-a]pyrazin-6(7H)-one

$^1\text{H}$  NMR (400 MHz,  $\text{DMSO}-d_6$ )  $\delta$  ppm 8.58 (br s, 1 H), 7.99 - 8.07 (m, 1 H), 7.65 (br d,  $J=8.01$  Hz, 1 H), 7.42 - 7.48 (m, 2 H), 7.36 - 7.41 (m, 2 H), 7.30 (t,  $J=7.63$  Hz, 2 H), 7.25 (t,  $J=8.92$  Hz, 2 H), 7.20 (d,  $J=7.34$  Hz, 1 H), 6.09 (d,  $J=5.15$  Hz, 1 H), 4.96 - 5.09 (m, 1 H), 4.72 - 4.81 (m, 3 H), 1.43 (d,  $J=6.96$  Hz, 3 H).  $[\text{M}+\text{H}]^+ = 429.13$ , calculated exact mass for  $\text{C}_{24}\text{H}_{22}\text{FN}_6\text{O} = 429.18$ ; purity 99%;  $t_{\text{R}} = 2.895$  min.

$^1\text{H}$  NMR (400 MHz,  $\text{DMSO}-d_6$ )  $\delta$  ppm 8.58 (br s, 1 H), 7.99 - 8.07 (m, 1 H), 7.65 (br d,  $J=8.01$  Hz, 1 H), 7.42 - 7.48 (m, 2 H), 7.36 - 7.41 (m, 2 H), 7.30 (t,  $J=7.63$  Hz, 2 H), 7.25 (t,  $J=8.92$  Hz, 2 H), 7.20 (d,  $J=7.34$  Hz, 1 H), 6.09 (d,  $J=5.15$  Hz, 1 H), 4.96 - 5.09 (m, 1 H), 4.72 - 4.81 (m, 3 H), 1.43 (d,  $J=6.96$  Hz, 3 H)

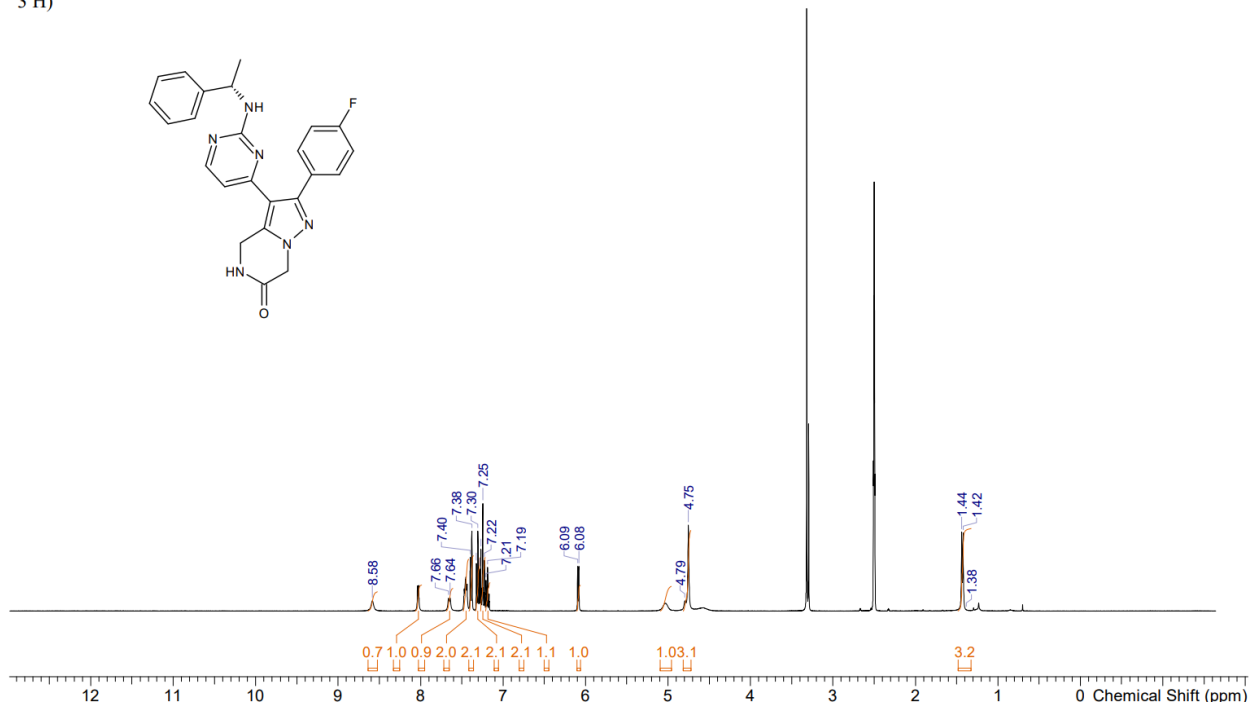

Figure S3.A  $^1\text{H}$  NMR (400 MHz,  $\text{DMSO}-d_6$ ) spectra of Compound 47.

**Sample Chromatograms**

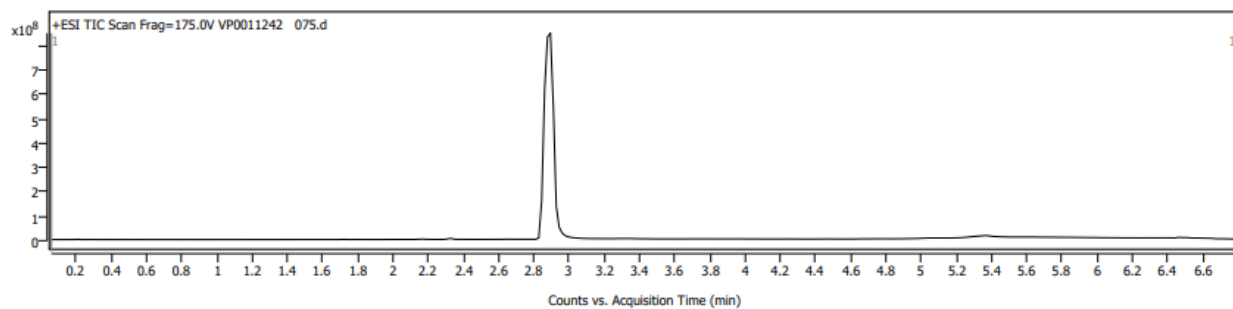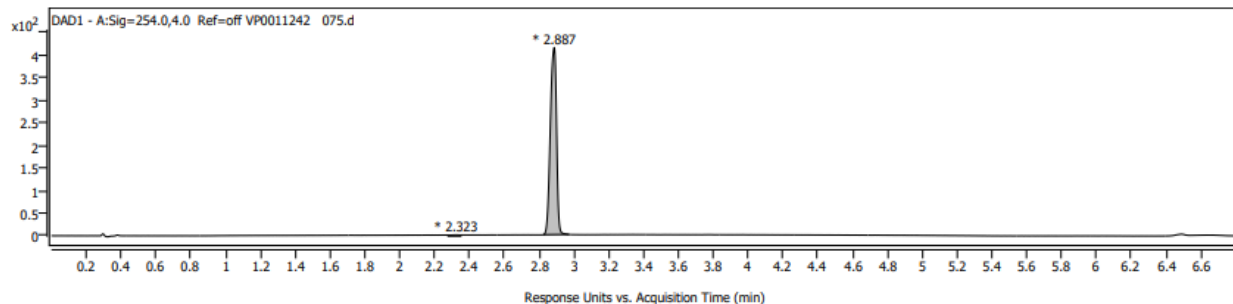

*Chromatogram Peaks*

| Peak | Start | RT    | End   | Height | Area | Area Sum % |
|------|-------|-------|-------|--------|------|------------|
| 1    | 2.278 | 2.323 | 2.350 | 3      | 10   | 0.99       |
| 2    | 2.824 | 2.887 | 2.972 | 415    | 1025 | 99.01      |

**Sample Spectra**

**+ Scan (rt: 2.895 min)**

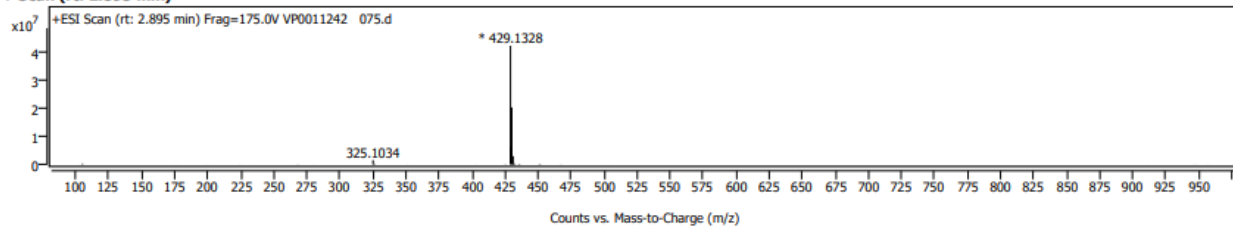

*Spectrum Peaks*

| m/z      | Z | Abund    | Abund % | m/z (Calc) | Diff (ppm) | Ion Species | Formula | Ion Type |
|----------|---|----------|---------|------------|------------|-------------|---------|----------|
| 325.1034 |   | 1461586  | 3.48    |            |            |             |         |          |
| 429.1328 | 1 | 41980840 | 100.00  |            |            |             |         |          |
| 429.3026 | 1 | 6107177  | 14.55   |            |            |             |         |          |
| 430.1291 | 1 | 20124236 | 47.94   |            |            |             |         |          |
| 430.3093 | 1 | 1593661  | 3.80    |            |            |             |         |          |
| 431.1307 | 1 | 2883134  | 6.87    |            |            |             |         |          |

**Figure S3.B** LC-MS spectra for Compound 47.

## Compound 48

### 2-(4-fluorophenyl)-3-(2-(isopropylamino)pyrimidin-4-yl)-4,5-dihydropyrazolo[1,5-a]pyrazin-6(7H)-one

$^1\text{H}$  NMR (400 MHz,  $\text{DMSO}-d_6$ )  $\delta$  ppm 7.97 - 8.07 (m, 1 H), 7.42 - 7.51 (m, 2 H), 7.22 - 7.30 (m, 2 H), 6.08 (d,  $J=5.15$  Hz, 1 H), 4.77 (br d,  $J=2.57$  Hz, 4 H), 3.92 - 4.02 (m, 1 H), 1.14 (d,  $J=6.48$  Hz, 6 H).  $[\text{M}+\text{H}]^+ = 367.14$ , calculated exact mass for  $\text{C}_{19}\text{H}_{20}\text{FN}_6\text{O} = 367.17$ ; purity 96%;  $t_R = 2.164$  min.

$^1\text{H}$  NMR (400 MHz,  $\text{DMSO}-d_6$ )  $\delta$  ppm 7.97 - 8.07 (m, 1 H), 7.42 - 7.51 (m, 2 H), 7.22 - 7.30 (m, 2 H), 6.08 (d,  $J=5.15$  Hz, 1 H), 4.77 (br d,  $J=2.57$  Hz, 4 H), 3.92 - 4.02 (m, 1 H), 1.14 (d,  $J=6.48$  Hz, 6 H)

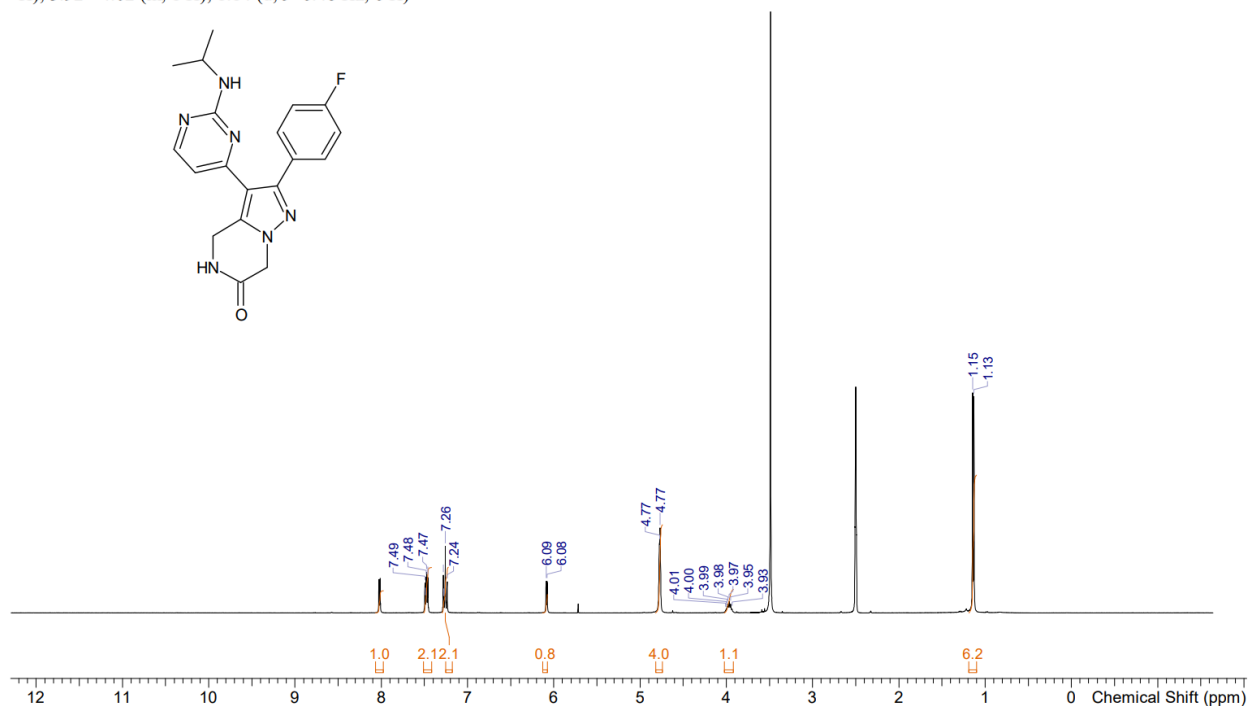

Figure S4.A  $^1\text{H}$  NMR (400 MHz,  $\text{DMSO}-d_6$ ) spectra of Compound 48.

### Sample Chromatograms

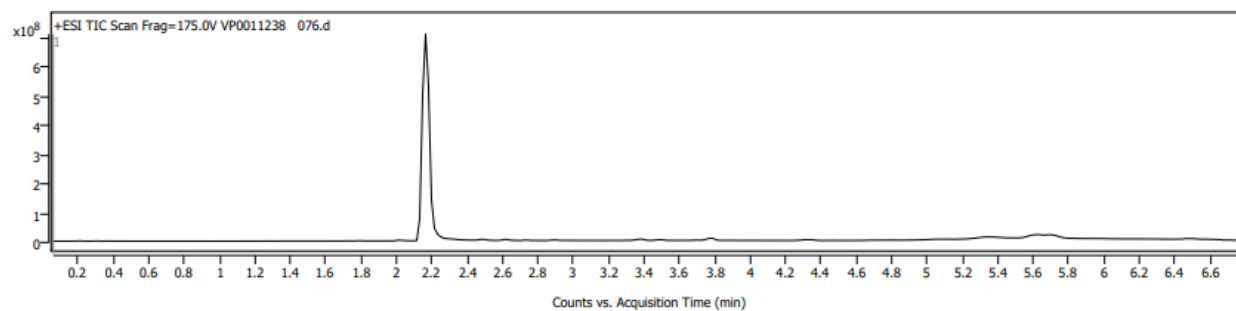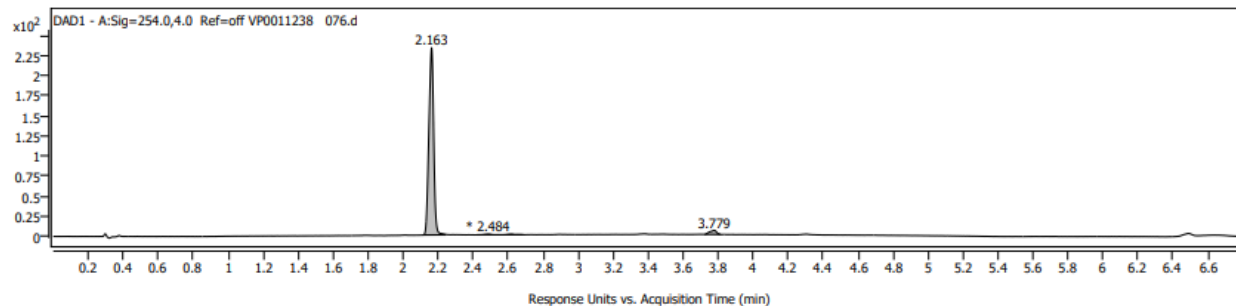

#### Chromatogram Peaks

| Peak | Start | RT    | End   | Height | Area | Area Sum % |
|------|-------|-------|-------|--------|------|------------|
| 1    | 2.116 | 2.163 | 2.241 | 233    | 443  | 95.92      |
| 2    | 2.423 | 2.484 | 2.687 | 1      | 5    | 1.10       |
| 3    | 3.725 | 3.779 | 3.814 | 5      | 14   | 2.97       |

### Sample Spectra

#### + Scan (rt: 2.164 min)

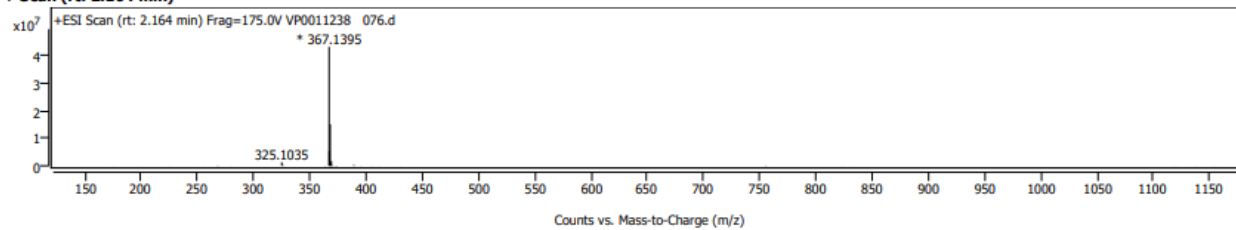

#### Spectrum Peaks

| m/z      | Z | Abund    | Abund % | m/z (Calc) | Diff (ppm) | Ion Species | Formula | Ion Type |
|----------|---|----------|---------|------------|------------|-------------|---------|----------|
| 325.1035 |   | 1275109  | 2.96    |            |            |             |         |          |
| 367.1395 | 1 | 43088320 | 100.00  |            |            |             |         |          |
| 367.2972 | 1 | 5299596  | 12.30   |            |            |             |         |          |
| 368.1375 | 1 | 15027121 | 34.88   |            |            |             |         |          |
| 368.3042 | 1 | 1247046  | 2.89    |            |            |             |         |          |
| 369.1395 | 1 | 1751392  | 4.06    |            |            |             |         |          |

Figure S4.B LC-MS spectra for Compound 48.

## Compound 50

**3-(2-(cyclohexylamino)pyridin-4-yl)-2-(4-fluorophenyl)-4,5-dihydropyrazolo[1,5-a]pyrazin-6(7H)-one**  
 $^1\text{H NMR}$  (400 MHz,  $\text{DMSO-}d_6$ )  $\delta$  ppm 8.54 (s, 1 H), 7.85 - 7.90 (m, 1 H), 7.39 - 7.48 (m, 2 H), 7.15 - 7.25 (m, 2 H), 6.32 (d,  $J=7.63$  Hz, 1 H), 6.16 - 6.23 (m, 2 H), 4.78 (s, 2 H), 4.48 (s, 2 H), 3.50 - 3.56 (m, 1 H), 3.47 - 3.50 (m, 1 H), 1.79 - 1.91 (m, 2 H), 1.62 - 1.72 (m, 2 H), 1.51 - 1.61 (m, 1 H), 1.21 - 1.30 (m, 2 H), 1.04 - 1.18 (m, 3 H).  $[\text{M}+\text{H}]^+ = 406.16$ , calculated exact mass for  $\text{C}_{23}\text{H}_{25}\text{FN}_5\text{O} = 406.20$ ; purity 98%;  $t_{\text{R}} = 2.254$  min.

$^1\text{H NMR}$  (400 MHz,  $\text{DMSO-}d_6$ )  $\delta$  ppm 8.54 (s, 1 H), 7.85 - 7.90 (m, 1 H), 7.39 - 7.48 (m, 2 H), 7.15 - 7.25 (m, 2 H), 6.32 (d,  $J=7.63$  Hz, 1 H), 6.16 - 6.23 (m, 2 H), 4.78 (s, 2 H), 4.48 (s, 2 H), 3.50 - 3.56 (m, 1 H), 3.47 - 3.50 (m, 1 H), 1.79 - 1.91 (m, 2 H), 1.62 - 1.72 (m, 2 H), 1.51 - 1.61 (m, 1 H), 1.21 - 1.30 (m, 2 H), 1.04 - 1.18 (m, 3 H)

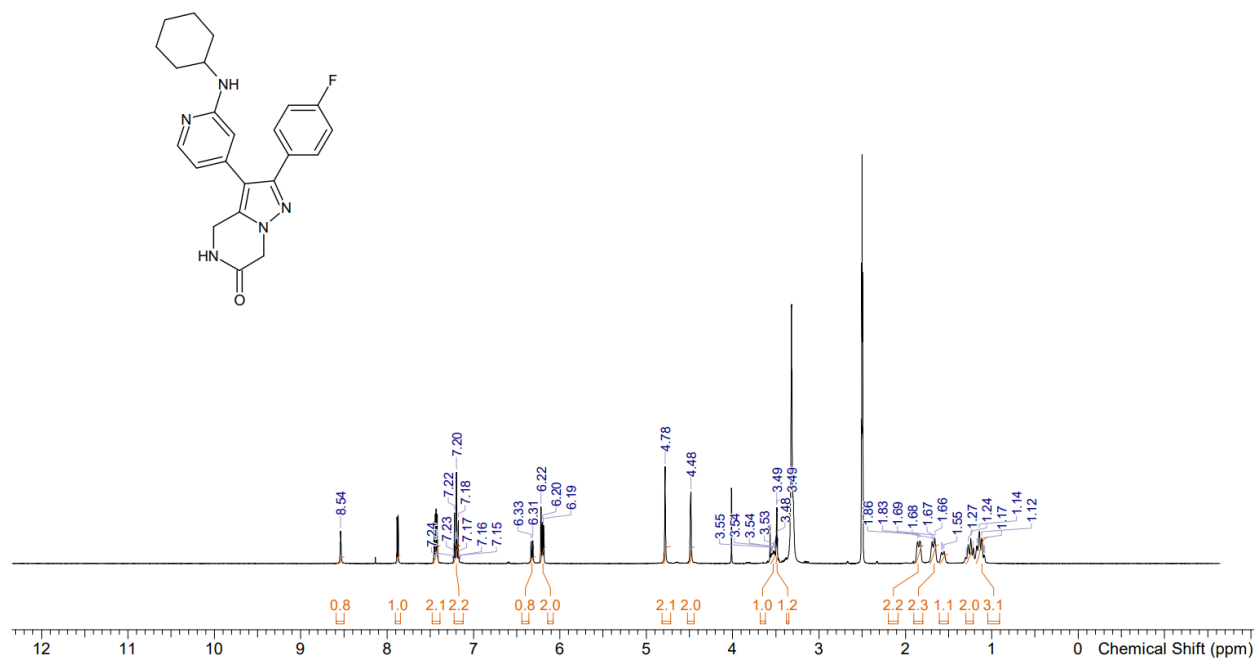

Figure S5.A  $^1\text{H NMR}$  (400 MHz,  $\text{DMSO-}d_6$ ) spectra of Compound 50.

### Sample Chromatograms

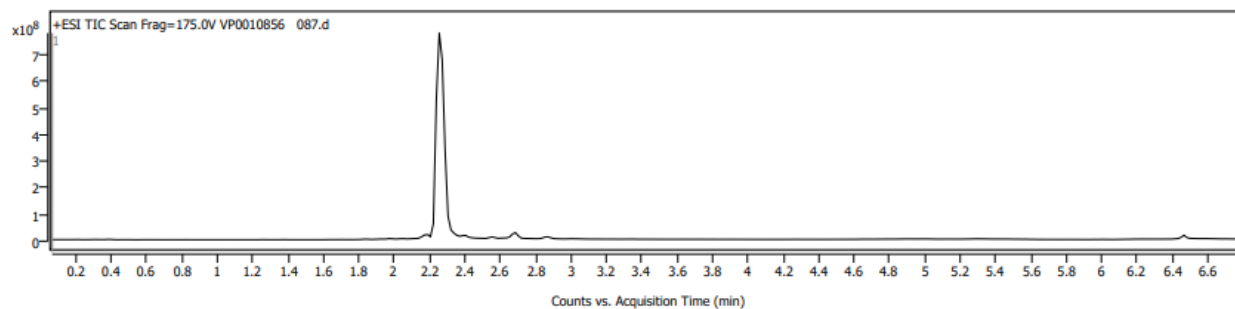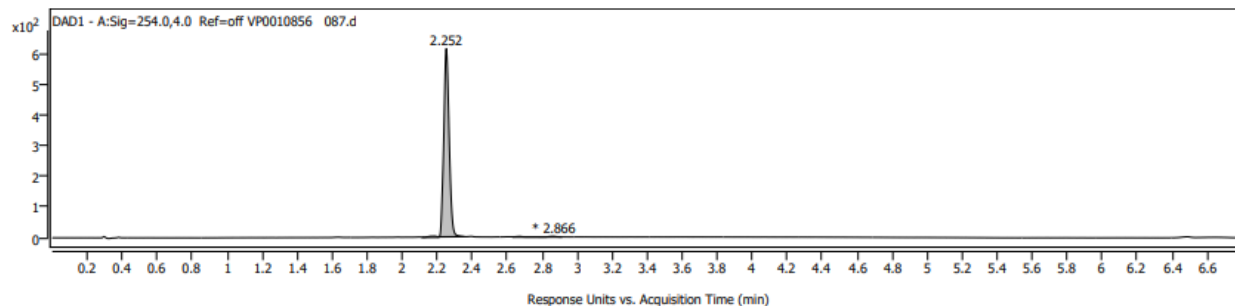

#### Chromatogram Peaks

| Peak | Start | RT    | End   | Height | Area | Area Sum % |
|------|-------|-------|-------|--------|------|------------|
| 1    | 2.115 | 2.183 | 2.208 | 4      | 14   | 1.06       |
| 2    | 2.209 | 2.252 | 2.356 | 614    | 1312 | 97.82      |
| 3    | 2.634 | 2.866 | 2.910 | 2      | 15   | 1.13       |

### Sample Spectra

#### + Scan (rt: 2.254 min)

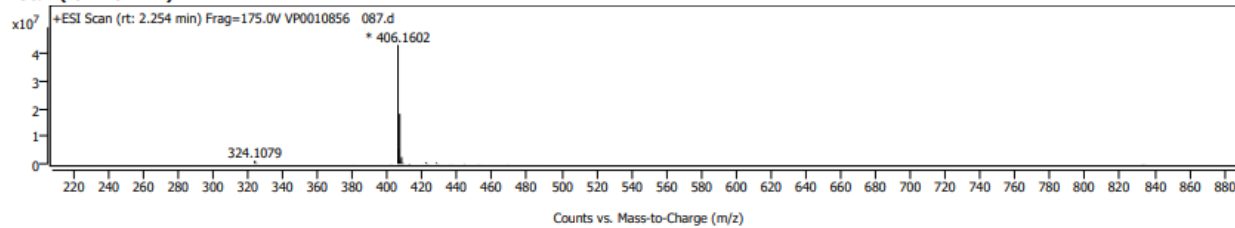

#### Spectrum Peaks

| m/z      | Z | Abund    | Abund % | m/z (Calc) | Diff (ppm) | Ion Species | Formula | Ion Type |
|----------|---|----------|---------|------------|------------|-------------|---------|----------|
| 324.1079 |   | 1134115  | 2.62    |            |            |             |         |          |
| 406.1602 | 1 | 43227780 | 100.00  |            |            |             |         |          |
| 406.3292 | 1 | 5449052  | 12.61   |            |            |             |         |          |
| 407.1578 | 1 | 18182132 | 42.06   |            |            |             |         |          |
| 407.3295 | 1 | 1424281  | 3.29    |            |            |             |         |          |
| 408.1596 | 1 | 2460707  | 5.69    |            |            |             |         |          |
| 422.1436 |   | 503525   | 1.16    |            |            |             |         |          |

Figure S5.B LC-MS spectra for Compound 50.

Compound **53**

**3-(2-(cyclopropylamino)pyrimidin-4-yl)-2-(4-fluorophenyl)-4,5-dihydropyrazolo[1,5-a]pyrazin-6(7H)-one**

$^1\text{H}$  NMR (400 MHz,  $\text{DMSO-}d_6$ )  $\delta$  ppm 8.57 - 8.65 (m, 1 H), 8.05 (br d,  $J=5.05$  Hz, 1 H), 7.47 - 7.55 (m, 2 H), 7.34 (d,  $J=2.86$  Hz, 1 H), 7.23 - 7.31 (m, 2 H), 6.15 (d,  $J=5.25$  Hz, 1 H), 4.89 (br s, 2 H), 4.77 (s, 2 H), 2.61 - 2.69 (m, 1 H), 0.67 - 0.75 (m, 2 H), 0.45 - 0.50 (m, 2 H).  $[\text{M}+\text{H}]^+ = 365.12$ , calculated exact mass for  $\text{C}_{19}\text{H}_{18}\text{FN}_6\text{O} = 365.15$ ; purity 98%;  $t_R = 2.046$  min.

$^1\text{H}$  NMR (400 MHz,  $\text{DMSO-}d_6$ )  $\delta$  ppm 8.57 - 8.65 (m, 1 H), 8.05 (br d,  $J=5.05$  Hz, 1 H), 7.47 - 7.55 (m, 2 H), 7.34 (d,  $J=2.86$  Hz, 1 H), 7.23 - 7.31 (m, 2 H), 6.15 (d,  $J=5.25$  Hz, 1 H), 4.89 (br s, 2 H), 4.77 (s, 2 H), 2.61 - 2.69 (m, 1 H), 0.67 - 0.75 (m, 2 H), 0.45 - 0.50 (m, 2 H)

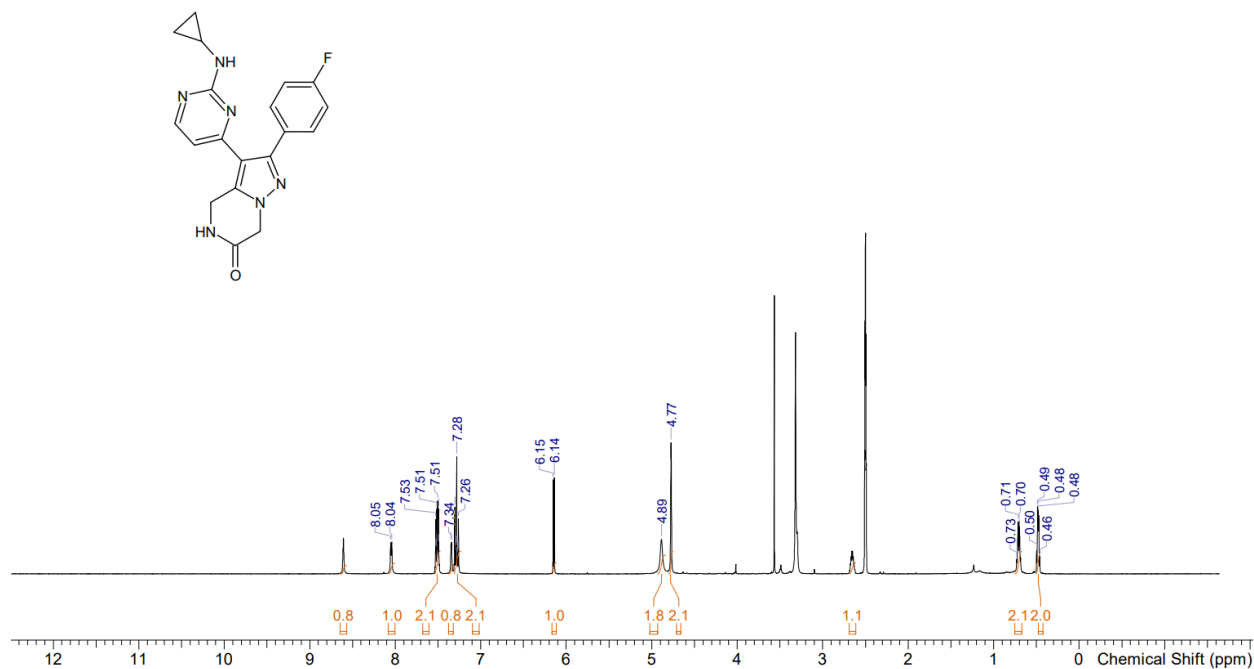

Figure S6.A  $^1\text{H}$  NMR (400 MHz,  $\text{DMSO-}d_6$ ) spectra of Compound **53**.

**Sample Chromatograms**

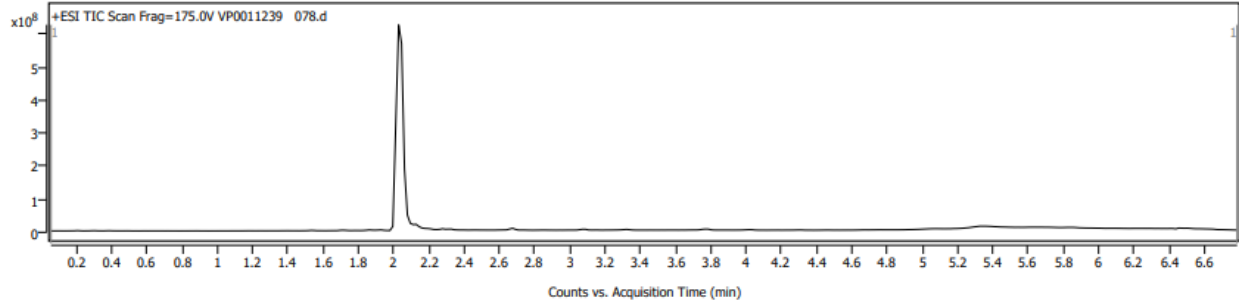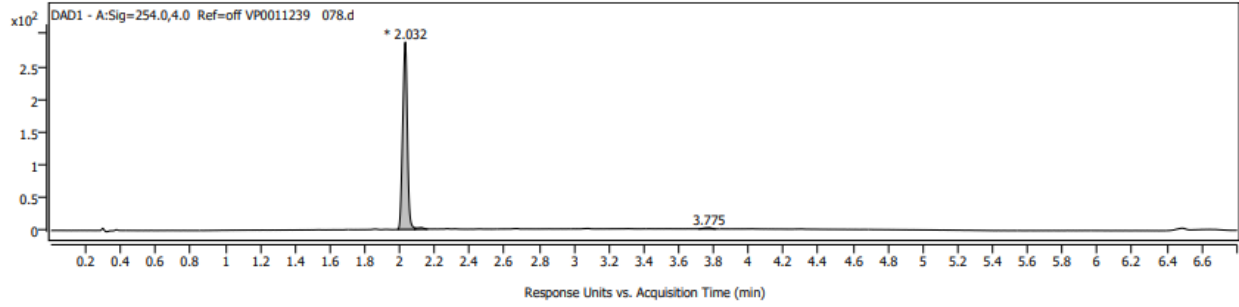

*Chromatogram Peaks*

| Peak | Start | RT    | End   | Height | Area | Area Sum % |
|------|-------|-------|-------|--------|------|------------|
| 1    | 1.987 | 2.032 | 2.088 | 285    | 532  | 97.56      |
| 2    | 2.088 | 2.123 | 2.158 | 3      | 8    | 1.42       |
| 3    | 3.717 | 3.775 | 3.811 | 2      | 6    | 1.03       |

**Sample Spectra**

**+ Scan (rt: 2.046 min)**

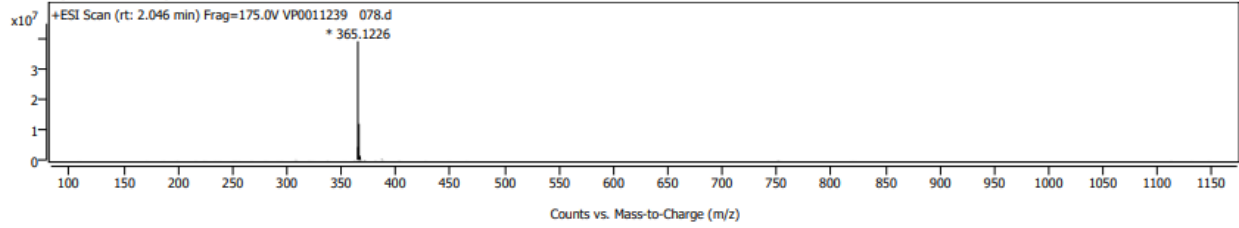

*Spectrum Peaks*

| m/z      | Z | Abund    | Abund % | m/z (Calc) | Diff (ppm) | Ion Species | Formula | Ion Type |
|----------|---|----------|---------|------------|------------|-------------|---------|----------|
| 365.1226 | 1 | 39280704 | 100.00  |            |            |             |         |          |
| 365.2861 | 1 | 4254160  | 10.83   |            |            |             |         |          |
| 366.1222 | 1 | 11941418 | 30.40   |            |            |             |         |          |
| 366.2872 | 1 | 960453   | 2.45    |            |            |             |         |          |
| 367.1246 | 1 | 1335036  | 3.40    |            |            |             |         |          |

**Figure S6.B** LC-MS spectra for Compound **53**.

## ADMET Characterization

### Protein Binding

Plasma protein binding was determined using equilibrium dialysis in a 96-well Teflon-based format. Human plasma spiked with 10  $\mu\text{M}$  of the test compound (1% DMSO) was dialyzed against phosphate-buffered saline (PBS, pH 7.4) at 37 °C for 4 hours. LC/MS/MS analysis was used to quantify the compound in both the protein and buffer compartments. Fraction unbound was determined, and control compounds (Acebutolol, Quinidine, and Warfarin) were included to assess compound stability and nonspecific adsorption.

### Aqueous Solubility

Solubility was assessed by incubating the compound (200  $\mu\text{M}$ , 2% DMSO) in several aqueous media, including PBS (pH 7.4), simulated gastric fluid (pH ~2), and simulated intestinal fluid (pH 7.5). After a 24-hour incubation at room temperature, samples were centrifuged, and the supernatants were analyzed by LC/UV/MS. Solubility values were calculated relative to a calibration standard. Reference control compounds (diethylstilbestrol, disulfiram, metoprolol, phenytoin, rifampicin, simvastatin, and tamoxifen) were included to verify assay performance across a range of solubility values.

### Partition Coefficient (LogD)

The distribution coefficient (log D) was evaluated using a shake-flask method in a 96-well plate. The compound (100  $\mu\text{M}$ ) was partitioned between n-octanol and PBS (pH 7.4) for 2 hours at room temperature. Following phase separation by centrifugation, concentrations in each phase were determined by LC/UV/MS. Log D was calculated as the logarithmic ratio of compound concentrations in the octanol and aqueous phases. Reference compounds with established log D values (diethylstilbestrol, haloperidol, ketoconazole, metoprolol, phenytoin, rifampicin, simvastatin, and tamoxifen) were included as assay controls to verify method performance.

### Caco-2 Permeability

Bidirectional permeability (A→B and B→A) was measured in Caco-2 monolayers (C2BBE1 clone, ATCC CRL-2102) cultured on 96-well Transwell plates, 21–25 days post-seeding. The compound (10  $\mu\text{M}$ , 1% DMSO) was applied in HBSS buffer and incubated at 37 °C for either 60 min (A→B) or 40 min (B→A). For P-glycoprotein inhibition studies, 100  $\mu\text{M}$  verapamil was included. LC/MS/MS was used to quantify compound transport, and fluorescein permeability was measured to verify monolayer integrity. Reference compounds (colchicine, labetalol, propranolol, and ranitidine) were included as permeability controls to verify assay performance.

### Half-life in Human Plasma

Plasma stability was assessed by incubating the test compound at 1  $\mu\text{M}$  (0.5% DMSO) in human plasma at 37 °C. Aliquots were taken at 0, 0.5, 1, 1.5, and 2 hours, quenched with acetonitrile, and centrifuged. The supernatants were analyzed by LC/MS/MS, and the percentage of compound remaining was used to calculate half-life, assuming first-order kinetics. Reference

compounds (propranolol and propoxycaïne) were included as stability controls to verify assay performance.

### Intrinsic Clearance

Intrinsic clearance was evaluated in pooled human liver S9 fractions (1 mg/mL). The test compound (0.5  $\mu$ M) was incubated with a cofactor mixture (UDPGA, glutathione, and PAPS) at 37 °C. Reactions were initiated by adding an NADPH-generating system and stopped at defined time points (0–90 min). LC/MS/MS quantification enabled determination of compound degradation, from which half-life and intrinsic clearance ( $Cl_{int}$ ) values were calculated. Reference compounds (imipramine, propranolol, terfenadine, and verapamil) were included as metabolic stability controls to verify assay performance.

### CYP3A Inhibition

The evaluation of CYP3A inhibition utilized pooled human liver microsomes (0.1 mg/mL; mixed gender, 50 donors) suspended in phosphate buffer (pH 7.4). Test compounds (10  $\mu$ M) were co-incubated with CYP3A probe substrates midazolam and testosterone for 5 minutes at 37°C. Following the addition of an NADPH-generating system, reactions proceeded for 10 minutes. Samples were terminated using acetonitrile/methanol, centrifuged, and subjected to LC/MS/MS analysis to quantify 1-hydroxymidazolam and 6 $\beta$ -hydroxytestosterone production. Inhibition potency was calculated relative to vehicle controls, with ketoconazole serving as the reference inhibitor.

### Kinase Selectivity Assay

Kinome profiling was performed using a large-scale kinase binding assay (KINOMEScan® platform, DiscoverX Corporation). Kinase-tagged T7 phage strains were cultured in parallel using a 24-well block format in an *E. coli* host derived from the BL21 strain. The *E. coli* cultures were grown to the log phase before being infected with T7 phage from a frozen stock at a multiplicity of infection (MOI) of 0.4. The cultures were incubated at 32°C with shaking until lysis occurred (90–150 minutes). After lysis, the crude lysates were centrifuged at 6,000  $\times$  g and filtered (0.2  $\mu$ m) to remove cellular debris. In addition to the phage-derived kinases, HEK-293 cells were used to express certain kinases, which were subsequently tagged with DNA to enable qPCR-based detection.

To prepare the affinity resins for kinase binding assays, streptavidin-coated magnetic beads were incubated for 30 minutes at room temperature with biotinylated small-molecule ligands. After ligand immobilization, the beads were blocked with excess biotin and washed with a blocking buffer (containing SeaBlock (Pierce), 1% BSA, 0.05% Tween 20, and 1 mM DTT) to remove unbound ligand and minimize non-specific phage binding.

For the kinase binding reactions, kinases, liganded affinity beads, and test compounds were combined in a 1 $\times$  binding buffer (composed of 20% SeaBlock, 0.17 $\times$  PBS, 0.05% Tween 20, and 6 mM DTT). Test compounds were prepared as 40 $\times$  stock solutions in 100% DMSO and directly

diluted into the assay mixture. All reactions were conducted in polypropylene 384-well plates, with a final reaction volume of 20  $\mu$ L, and incubated for 1 hour at room temperature with shaking.

Following incubation, the affinity beads were washed with a wash buffer (1 $\times$  PBS, 0.05% Tween 20) to remove unbound kinases. The bound kinases were then eluted by resuspending the beads in an elution buffer (1 $\times$  PBS, 0.05% Tween 20, 0.5  $\mu$ M non-biotinylated affinity ligand) and incubating for 30 minutes at room temperature with shaking. The concentration of kinases in the eluates was subsequently measured using qPCR.

DMSO was used as the negative control (100% control signal), while an internal reference inhibitor provided within the KINOMEscan assay platform served as the positive control (0% control signal).

Kinome profiling results were visualized using a phylogenetic kinase tree representation (TREEspot™ software, DiscoverX Corporation). The resulting images were generated and reprinted with permission. © DISCOVERX CORPORATION 2010.

# Full MolSHAP Analysis of Substituent Contributions

Table S1. MolSHAP-Predicted Substructure Contributions to Compound Activity (pIC<sub>50</sub>).

| Compound Structure                                                                  | Predicted pIC <sub>50</sub> Contribution | R-Group Number |
|-------------------------------------------------------------------------------------|------------------------------------------|----------------|
| 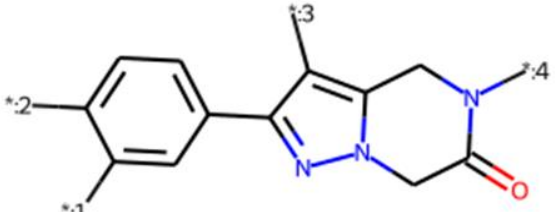   | 0                                        | Main Scaffold  |
|  | 0                                        | 1              |
|  | +0.299                                   | 1              |
|  | 0                                        | 2              |

|                                                                                                 |        |   |
|-------------------------------------------------------------------------------------------------|--------|---|
|  <p>*:2—Cl</p> | +0.018 | 2 |
|  <p>*:2—F</p>  | +0.136 | 2 |
|  <p>*:3</p>   | 0      | 3 |
|  <p>*:3</p>  | +0.032 | 3 |
|  <p>*:3</p>  | +0.571 | 3 |

|                                                                                                                                                                                                                                                                                                                                                                      |        |   |
|----------------------------------------------------------------------------------------------------------------------------------------------------------------------------------------------------------------------------------------------------------------------------------------------------------------------------------------------------------------------|--------|---|
| 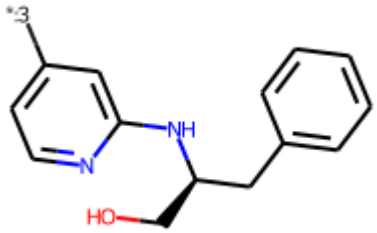 <p>Chemical structure of a 3-methylpyridine derivative. The pyridine ring has a methyl group (CH<sub>3</sub>) at the 3-position. The nitrogen atom is connected to a benzyl group (-CH<sub>2</sub>-C<sub>6</sub>H<sub>5</sub>) and a hydroxyl group (-OH) via a nitrogen atom.</p> | +0.867 | 3 |
|  <p>Chemical structure of a 3-methylpyridine derivative. The pyridine ring has a methyl group (CH<sub>3</sub>) at the 3-position. The nitrogen atom is connected to a piperidine ring via a nitrogen atom.</p>                                                                      | +0.980 | 3 |
|  <p>Chemical structure of a 3-methylpyridine derivative. The pyridine ring has a methyl group (CH<sub>3</sub>) at the 3-position. The nitrogen atom is connected to a 1-hydroxyethyl group (-CH(OH)-CH<sub>3</sub>) via a nitrogen atom.</p>                                       | +1.03  | 3 |
|  <p>Chemical structure of a 3-methylpyridine derivative. The pyridine ring has a methyl group (CH<sub>3</sub>) at the 3-position. The nitrogen atom is connected to a 1,2-dihydroxyethyl group (-CH(OH)-CH<sub>2</sub>-OH) via a nitrogen atom.</p>                               | +1.155 | 3 |
|  <p>Chemical structure of a 3-methylpyridine derivative. The pyridine ring has a methyl group (CH<sub>3</sub>) at the 3-position. The nitrogen atom is connected to a tetrahydrofuran ring via a nitrogen atom.</p>                                                               | +1.174 | 3 |

|                                                                                     |        |   |
|-------------------------------------------------------------------------------------|--------|---|
| 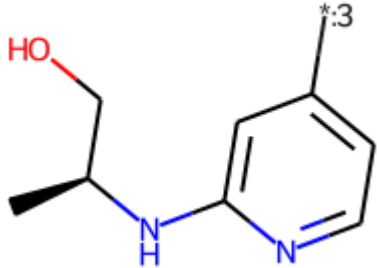   | +1.313 | 3 |
|    | +1.518 | 3 |
|   | +1.600 | 3 |
|  | +1.878 | 3 |
|  | +1.909 | 3 |

|                                                                                     |        |   |
|-------------------------------------------------------------------------------------|--------|---|
| 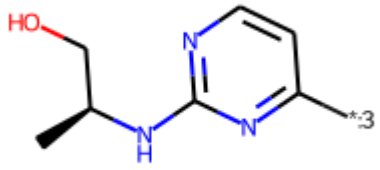   | +2.108 | 3 |
|    | +2.149 | 3 |
|   | +2.319 | 3 |
|  | +2.466 | 3 |
|  | +2.664 | 3 |

|                                                                                     |        |   |
|-------------------------------------------------------------------------------------|--------|---|
| 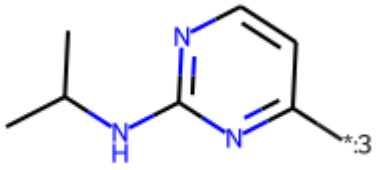   | +2.841 | 3 |
|    | +3.135 | 3 |
|   | -0.851 | 4 |
|  | -0.603 | 4 |
|  | -0.484 | 4 |

|                                                                                    |        |   |
|------------------------------------------------------------------------------------|--------|---|
| 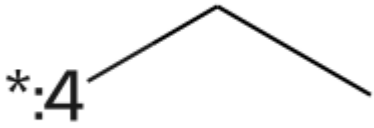  | -0.012 | 4 |
|   | 0      | 4 |
|  | +0.121 | 4 |

**Notes:** Asterisk (\*) denotes the R-group attachment point on the core scaffold. The numbered attachment positions (:1, \*:2, \*:3, \*:4) are defined in the first row ("Main Scaffold") and correspond to the R-group numbering used throughout the table.

## Full ADME Profiling Data of Key Compounds

**Table S2. ADME Profiling Data for Selected Compounds 26, 28, 47, 48, 50, and 53.**

**Table S2.A Protein binding (plasma, human)**

|                    |                        | % Protein Bound |       |       | % Recovery |        |        |
|--------------------|------------------------|-----------------|-------|-------|------------|--------|--------|
| Compound           | Test Concentration (M) | 1st             | 2nd   | Mean  | 1st        | 2nd    | Mean   |
| Compound <b>26</b> | 1.00E-05               | 83.43           | 81.87 | 82.65 | 113.66     | 114.71 | 114.18 |
| Compound <b>28</b> | 1.00E-05               | 83.37           | 81.18 | 82.27 | 116.50     | 111.96 | 114.23 |
| Compound <b>47</b> | 1.00E-05               | 94.22           | 96.31 | 95.27 | 112.10     | 106.43 | 109.26 |
| Compound <b>48</b> | 1.00E-05               | 88.52           | 87.94 | 88.23 | 117.62     | 111.35 | 114.48 |
| Compound <b>50</b> | 1.00E-05               | 97.68           | 93.12 | 95.40 | 119.95     | 109.73 | 114.84 |
| Compound <b>53</b> | 1.00E-05               | 88.52           | 87.94 | 88.23 | 117.62     | 111.35 | 114.48 |
| Acebutolol         | 1.00E-05               | 24.2            | 35.83 | 30.01 | 124.52     | 115.01 | 119.76 |
| Quinidine          | 1.00E-05               | 70.53           | 68.02 | 69.28 | 127.77     | 115.78 | 121.78 |
| Warfarin           | 1.00E-05               | 91.65           | 94.98 | 93.32 | 121.85     | 109.46 | 115.65 |

**Table S2.B Aqueous solubility (PBS, pH 7.4)**

|                    |                        | Solubility (µM) |        |        |
|--------------------|------------------------|-----------------|--------|--------|
| Compound           | Test Concentration (M) | 1st             | 2nd    | Mean   |
| Compound <b>26</b> | 2.00E-04               | 196.44          | 199.26 | 197.85 |
| Compound <b>28</b> | 2.00E-04               | 195.52          | 197.58 | 196.55 |
| Compound <b>47</b> | 2.00E-04               | 73.38           | 78.75  | 76.06  |
| Compound <b>48</b> | 2.00E-04               | 15.30           | 12.37  | 13.83  |
| Compound <b>50</b> | 2.00E-04               | 44.86           | 15.38  | 30.12  |
| Compound <b>53</b> | 2.00E-04               | 17.33           | 24.18  | 20.76  |
| Diethylstilbestrol | 2.00E-04               | 11.91           | 4.16   | 8.03   |
| Disulfiram         | 2.00E-04               | 55.06           | 52.97  | 54.01  |
| Metoprolol         | 2.00E-04               | 201.53          | 203.49 | 202.51 |
| Phenytoin          | 2.00E-04               | 83.79           | 86.66  | 85.23  |
| Rifampicin         | 2.00E-04               | 186.34          | 187.44 | 186.89 |
| Simvastatin        | 2.00E-04               | 20.44           | 20.78  | 20.61  |
| Tamoxifen          | 2.00E-04               | 2.18            | 2.65   | 2.41   |

**Table S2.C Partition coefficient (log D, n-octanol/PBS, pH 7.4).** BQA indicates below the Limit of Quantitation in Aqueous phase

| Compound           | Test Concentration (M) | LogD  | Flag |
|--------------------|------------------------|-------|------|
| Compound 26        | 1.00E-04               | 2.07  |      |
| Compound 28        | 1.00E-04               | 2.89  |      |
| Compound 47        | 1.00E-04               | 3.22  |      |
| Compound 48        | 1.00E-04               | 2.04  |      |
| Compound 50        | 1.00E-04               | 2.59  |      |
| Compound 53        | 1.00E-04               | 2.64  |      |
| Diethylstilbestrol | 1.00E-04               | >4.66 | BQA  |
| Haloperidol        | 1.00E-04               | 2.67  |      |
| Ketoconazole       | 1.00E-04               | 3.57  |      |
| Metoprolol         | 1.00E-04               | -0.34 |      |
| Phenytoin          | 1.00E-04               | 2.60  |      |
| Rifampicin         | 1.00E-04               | 1.25  |      |
| Simvastatin        | 1.00E-04               | >4.51 | BQA  |
| Tamoxifen          | 1.00E-04               | >4.88 | BQA  |

**Table S2.D A-B permeability (Caco-2, pH 7.4/7.4 + verapamil)**

| Compound    | Test Concentration (M) | Permeability ( $10^{-6}$ cm/s) |       |      | % Recovery |     |      |
|-------------|------------------------|--------------------------------|-------|------|------------|-----|------|
|             |                        | 1st                            | 2nd   | Mean | 1st        | 2nd | Mean |
| Compound 26 | 1.00E-05               | 5.95                           | 4.65  | 5.3  | 82         | 77  | 80   |
| Compound 28 | 1.00E-05               | 6.81                           | 7.01  | 6.9  | 57         | 55  | 56   |
| Compound 47 | 1.00E-05               | 10.48                          | 9.82  | 10.2 | 26         | 30  | 28   |
| Compound 48 | 1.00E-05               | 12.53                          | 10.33 | 11.4 | 43         | 46  | 45   |
| Compound 50 | 1.00E-05               | 3.10                           | 3.34  | 3.2  | 23         | 17  | 20   |
| Compound 53 | 1.00E-05               | 13.03                          | 11.00 | 12.0 | 53         | 49  | 51   |
| Colchicine  | 1.00E-05               | 0.32                           | 0.26  | 0.3  | 104        | 84  | 94   |
| Labetalol   | 1.00E-05               | 15.17                          | 15.15 | 15.2 | 69         | 72  | 70   |
| Propranolol | 1.00E-05               | 22                             | 24.65 | 23.3 | 46         | 44  | 45   |
| Ranitidine  | 1.00E-05               | 0.79                           | 0.91  | 0.9  | 82         | 86  | 84   |

**Table S2.E A-B permeability (Caco-2, pH 7.4/7.4)**

| Compound           | Test Concentration (M) | Permeability (10 <sup>-6</sup> cm/s) |       |      | % Recovery |     |      |
|--------------------|------------------------|--------------------------------------|-------|------|------------|-----|------|
|                    |                        | 1st                                  | 2nd   | Mean | 1st        | 2nd | Mean |
| Compound <b>26</b> | 1.00E-05               | 9.06                                 | 11.64 | 10.4 | 62         | 80  | 71   |
| Compound <b>28</b> | 1.00E-05               | 21.97                                | 23.13 | 22.6 | 66         | 82  | 74   |
| Compound <b>47</b> | 1.00E-05               | 16.59                                | 13.53 | 15.1 | 31         | 28  | 30   |
| Compound <b>48</b> | 1.00E-05               | 16.37                                | 27.24 | 21.8 | 52         | 58  | 55   |
| Compound <b>50</b> | 1.00E-05               | 10.60                                | 11.56 | 11.1 | 23         | 23  | 23   |
| Compound <b>53</b> | 1.00E-05               | 20.07                                | 19.50 | 19.8 | 66         | 68  | 67   |
| Colchicine         | 1.00E-05               | 0.29                                 | 0.25  | 0.3  | 83         | 85  | 84   |
| Labetalol          | 1.00E-05               | 14.77                                | 14.77 | 14.8 | 74         | 76  | 75   |
| Propranolol        | 1.00E-05               | 58.89                                | 58.02 | 58.5 | 61         | 61  | 61   |
| Ranitidine         | 1.00E-05               | 1.54                                 | 1.5   | 1.5  | 91         | 107 | 99   |

**Table S2.F B-A permeability (Caco-2, pH 7.4/7.4 + verapamil)**

| Compound           | Test Concentration (M) | Permeability (10 <sup>-6</sup> cm/s) |       |      | % Recovery |     |      |
|--------------------|------------------------|--------------------------------------|-------|------|------------|-----|------|
|                    |                        | 1st                                  | 2nd   | Mean | 1st        | 2nd | Mean |
| Compound <b>26</b> | 1.00E-05               | 28.23                                | 27.81 | 28.0 | 66         | 83  | 75   |
| Compound <b>28</b> | 1.00E-05               | 15.64                                | 14.03 | 14.8 | 59         | 52  | 55   |
| Compound <b>47</b> | 1.00E-05               | 2.84                                 | 2.55  | 2.7  | 12         | 13  | 13   |
| Compound <b>48</b> | 1.00E-05               | 15.72                                | 13.29 | 14.5 | 53         | 43  | 48   |
| Compound <b>50</b> | 1.00E-05               | 2.71                                 | 1.37  | 2.0  | 35         | 23  | 29   |
| Compound <b>53</b> | 1.00E-05               | 23.05                                | 18.87 | 21.0 | 57         | 69  | 63   |
| Colchicine         | 1.00E-05               | 1.22                                 | 1.42  | 1.3  | 129        | 119 | 124  |
| Labetalol          | 1.00E-05               | 9.16                                 | 9.16  | 9.2  | 76         | 76  | 76   |
| Propranolol        | 1.00E-05               | 20.91                                | 19.61 | 20.3 | 89         | 86  | 87   |
| Ranitidine         | 1.00E-05               | 0.47                                 | 0.29  | 0.4  | 54         | 78  | 66   |

**Table S2.G B-A permeability (Caco-2, pH 7.4/7.4)**

| Compound    | Test Concentration (M) | Permeability (10 <sup>-6</sup> cm/s) |       |      | % Recovery |     |      |
|-------------|------------------------|--------------------------------------|-------|------|------------|-----|------|
|             |                        | 1st                                  | 2nd   | Mean | 1st        | 2nd | Mean |
| Compound 26 | 1.00E-05               | 19.72                                | 19.76 | 19.7 | 25         | 25  | 25   |
| Compound 28 | 1.00E-05               | 15.13                                | 14.33 | 14.7 | 27         | 26  | 26   |
| Compound 47 | 1.00E-05               | 1.55                                 | 1.59  | 1.6  | 11         | 10  | 10   |
| Compound 48 | 1.00E-05               | 10.98                                | 11.61 | 11.3 | 27         | 28  | 28   |
| Compound 50 | 1.00E-05               | 3.27                                 | 2.99  | 3.1  | 35         | 38  | 36   |
| Compound 53 | 1.00E-05               | 15.07                                | 14.86 | 15.0 | 25         | 24  | 24   |
| Colchicine  | 1.00E-05               | 4.34                                 | 4.33  | 4.3  | 43         | 53  | 48   |
| Labetalol   | 1.00E-05               | 21.18                                | 21.52 | 21.4 | 57         | 61  | 59   |
| Propranolol | 1.00E-05               | 19.23                                | 17.75 | 18.5 | 68         | 73  | 70   |
| Ranitidine  | 1.00E-05               | 3.62                                 | 3.12  | 3.4  | 68         | 96  | 82   |

**Table S2.H Half-life in Human Plasma**

| Compound    | Test Concentration (M) | Incubation (Min) | % Compound Remaining |        |        | Half-Life (Min) |      |      |
|-------------|------------------------|------------------|----------------------|--------|--------|-----------------|------|------|
|             |                        |                  | 1st                  | 2nd    | Mean   | 1st             | 2nd  | Mean |
| Compound 26 | 1.00E-06               | 0                | 100.00               | 100.00 | 100.00 | >120            | >120 | >120 |
| Compound 26 | 1.00E-06               | 30               | 114.19               | 109.60 | 111.89 |                 |      |      |
| Compound 26 | 1.00E-06               | 60               | 115.40               | 124.77 | 120.08 |                 |      |      |
| Compound 26 | 1.00E-06               | 90               | 106.58               | 103.90 | 105.24 |                 |      |      |
| Compound 26 | 1.00E-06               | 120              | 118.47               | 102.61 | 110.54 |                 |      |      |
| Compound 28 | 1.00E-06               | 0                | 100.00               | 100.00 | 100.00 | >120            | >120 | >120 |
| Compound 28 | 1.00E-06               | 30               | 106.21               | 120.58 | 113.40 |                 |      |      |
| Compound 28 | 1.00E-06               | 60               | 98.51                | 122.43 | 110.47 |                 |      |      |
| Compound 28 | 1.00E-06               | 90               | 94.30                | 108.28 | 101.29 |                 |      |      |
| Compound 28 | 1.00E-06               | 120              | 115.69               | 116.96 | 116.32 |                 |      |      |
| Compound 47 | 1.00E-06               | 0                | 100.00               | 100.00 | 100.00 | >120            | >120 | >120 |
| Compound 47 | 1.00E-06               | 30               | 107.99               | 107.43 | 107.71 |                 |      |      |
| Compound 47 | 1.00E-06               | 60               | 104.71               | /      | 104.71 |                 |      |      |
| Compound 47 | 1.00E-06               | 90               | 87.76                | 106.11 | 96.93  |                 |      |      |

|                |          |     |        |        |        |      |      |      |
|----------------|----------|-----|--------|--------|--------|------|------|------|
| Compound 47    | 1.00E-06 | 120 | 123.24 | 109.01 | 116.13 |      |      |      |
| Compound 48    | 1.00E-06 | 0   | 100.00 | 100.00 | 100.00 | >120 | >120 | >120 |
| Compound 48    | 1.00E-06 | 30  | 102.30 | 98.49  | 100.39 |      |      |      |
| Compound 48    | 1.00E-06 | 60  | 102.70 | 110.14 | 106.42 |      |      |      |
| Compound 48    | 1.00E-06 | 90  | 90.72  | 93.70  | 92.21  |      |      |      |
| Compound 48    | 1.00E-06 | 120 | 116.02 | 110.68 | 113.35 |      |      |      |
| Compound 50    | 1.00E-06 | 0   | 100.00 | 100.00 | 100.00 | >120 | >120 | >120 |
| Compound 50    | 1.00E-06 | 30  | 90.81  | 84.37  | 87.59  |      |      |      |
| Compound 50    | 1.00E-06 | 60  | 100.97 | 105.46 | 103.22 |      |      |      |
| Compound 50    | 1.00E-06 | 90  | 112.86 | 89.45  | 101.16 |      |      |      |
| Compound 50    | 1.00E-06 | 120 | 128.58 | 97.88  | 113.23 |      |      |      |
| Compound 53    | 1.00E-06 | 0   | 100.00 | 100.00 | 100.00 | >120 | >120 | >120 |
| Compound 53    | 1.00E-06 | 30  | 88.98  | 86.56  | 87.77  |      |      |      |
| Compound 53    | 1.00E-06 | 60  | 100.64 | 111.12 | 105.88 |      |      |      |
| Compound 53    | 1.00E-06 | 90  | 107.05 | 92.41  | 99.73  |      |      |      |
| Compound 53    | 1.00E-06 | 120 | 105.33 | 96.49  | 100.91 |      |      |      |
| Proprantheline | 1.00E-06 |     |        |        |        | 14.9 | 14.9 | 14.9 |
| Proprantheline | 1.00E-06 |     |        |        |        | 15.4 | 15.0 | 15.2 |
| Propoxycaine   | 1.00E-06 |     |        |        |        | 2.5  | 2.4  | <2.5 |
| Propoxycaine   | 1.00E-06 |     |        |        |        | 3.3  | 2.8  | <3.0 |

**Table S2.I Intrinsic Clearance (Human liver microsomes)**

| Compound    | Test Concentration (M) | Incubation (Min) | % Compound Remaining |       |       | Half-Life (Min) |       |      | Clint (µl/min/mg) |
|-------------|------------------------|------------------|----------------------|-------|-------|-----------------|-------|------|-------------------|
|             |                        |                  | 1st                  | 2nd   | Mean  | 1st             | 2nd   | Mean |                   |
| Compound 26 | 1.00E-07               | 0                | 100                  | 100   | 100   | 412.0           | 921.5 | >60  | <115.5            |
| Compound 26 | 1.00E-07               | 15               | 94.83                | 92.90 | 93.87 |                 |       |      |                   |
| Compound 26 | 1.00E-07               | 30               | 88.31                | 85.58 | 86.95 |                 |       |      |                   |
| Compound 26 | 1.00E-07               | 45               | 89.56                | 88.86 | 89.21 |                 |       |      |                   |
| Compound 26 | 1.00E-07               | 60               | 90.71                | 96.64 | 93.67 |                 |       |      |                   |
| Compound 28 | 1.00E-07               | 0                | 100                  | 100   | 100   | 224.4           | 212.2 | >60  | <115.5            |

|                    |          |    |       |       |       |       |       |      |        |
|--------------------|----------|----|-------|-------|-------|-------|-------|------|--------|
| Compound <b>28</b> | 1.00E-07 | 15 | 88.41 | 91.23 | 89.82 |       |       |      |        |
| Compound <b>28</b> | 1.00E-07 | 30 | 97.25 | 87.27 | 92.26 |       |       |      |        |
| Compound <b>28</b> | 1.00E-07 | 45 | 80.94 | 81.77 | 81.36 |       |       |      |        |
| Compound <b>28</b> | 1.00E-07 | 60 | 82.90 | 82.68 | 82.79 |       |       |      |        |
| Compound <b>47</b> | 1.00E-07 | 0  | 100   | 100   | 100   | 17.2  | 16.5  | 16.8 | 411.9  |
| Compound <b>47</b> | 1.00E-07 | 15 | 57.90 | 56.94 | 57.42 |       |       |      |        |
| Compound <b>47</b> | 1.00E-07 | 30 | 28.23 | 24.99 | 26.61 |       |       |      |        |
| Compound <b>47</b> | 1.00E-07 | 45 | 16.32 | 13.38 | 14.85 |       |       |      |        |
| Compound <b>47</b> | 1.00E-07 | 60 | 9.10  | 8.84  | 8.97  |       |       |      |        |
| Compound <b>48</b> | 1.00E-07 | 0  | 100   | 100   | 100   | 321.3 | 242.2 | >60  | <115.5 |
| Compound <b>48</b> | 1.00E-07 | 15 | 91.33 | 94.02 | 92.67 |       |       |      |        |
| Compound <b>48</b> | 1.00E-07 | 30 | 88.10 | 87.79 | 87.95 |       |       |      |        |
| Compound <b>48</b> | 1.00E-07 | 45 | 89.73 | 89.59 | 89.66 |       |       |      |        |
| Compound <b>48</b> | 1.00E-07 | 60 | 85.82 | 82.65 | 84.23 |       |       |      |        |
| Compound <b>50</b> | 1.00E-07 | 0  | 100   | 100   | 100   | 5.2   | 5.1   | 5.1  | 1347.5 |
| Compound <b>50</b> | 1.00E-07 | 15 | 17.00 | 14.95 | 15.97 |       |       |      |        |
| Compound <b>50</b> | 1.00E-07 | 30 | 1.86  | 1.65  | 1.76  |       |       |      |        |
| Compound <b>50</b> | 1.00E-07 | 45 | 0.57  | 0.57  | 0.57  |       |       |      |        |
| Compound <b>50</b> | 1.00E-07 | 60 | 0.44  | 0.34  | 0.39  |       |       |      |        |
| Compound <b>53</b> | 1.00E-07 | 0  | 100   | 100   | 100   | 195.5 | 155.3 | >60  | <115.5 |
| Compound <b>53</b> | 1.00E-07 | 15 | 84.77 | 87.32 | 86.04 |       |       |      |        |
| Compound <b>53</b> | 1.00E-07 | 30 | 79.08 | 80.30 | 79.69 |       |       |      |        |
| Compound <b>53</b> | 1.00E-07 | 45 | 78.84 | 81.99 | 80.41 |       |       |      |        |
| Compound <b>53</b> | 1.00E-07 | 60 | 79.48 | 73.85 | 76.67 |       |       |      |        |
| Imipramine         | 1.00E-07 |    |       |       |       | 372.1 | 148.4 | >60  | <115.5 |
| Propranolol        | 1.00E-07 |    |       |       |       | 182.5 | 183.3 | >60  | <115.5 |
| Terfenadine        | 1.00E-07 |    |       |       |       | 11.4  | 11.2  | 11.3 | 614.3  |
| Verapamil          | 1.00E-07 |    |       |       |       | 42.8  | 44.6  | 43.7 | 158.7  |

**Table S2.J CYP3A inhibition with 5 µM Midazolam**

| Compound           | Test Concentration (M) | % Inhibition of Control Values |      |      |
|--------------------|------------------------|--------------------------------|------|------|
|                    |                        | 1st                            | 2nd  | Mean |
| Compound <b>26</b> | 1.00E-05               | 5.9                            | 2.6  | 4.3  |
| Compound <b>28</b> | 1.00E-05               | 11.1                           | 16.2 | 13.7 |
| Compound <b>47</b> | 1.00E-05               | 56.6                           | 57.9 | 57.3 |
| Compound <b>48</b> | 1.00E-05               | 2.5                            | 7.1  | 4.8  |
| Compound <b>50</b> | 1.00E-05               | -8.6                           | 3.8  | -2.4 |
| Compound <b>53</b> | 1.00E-05               | 1.9                            | 9.1  | 5.5  |
| Ketoconazole       | 3.00E-09               |                                |      | -0.9 |
| Ketoconazole       | 3.00E-08               |                                |      | 10.4 |
| Ketoconazole       | 1.00E-07               |                                |      | 46.4 |
| Ketoconazole       | 3.00E-07               |                                |      | 77.2 |
| Ketoconazole       | 1.00E-06               |                                |      | 92.2 |
| Ketoconazole       | 1.00E-05               |                                |      | 99   |

**Table S2.K CYP3A inhibition with 50 µM Testosterone**

| Compound           | Test Concentration (M) | % Inhibition of Control Values |      |      |
|--------------------|------------------------|--------------------------------|------|------|
|                    |                        | 1st                            | 2nd  | Mean |
| Compound <b>26</b> | 1.00E-05               | 20.6                           | 15.4 | 18.0 |
| Compound <b>28</b> | 1.00E-05               | 29.2                           | 25.4 | 27.3 |
| Compound <b>47</b> | 1.00E-05               | 54.3                           | 45.9 | 50.1 |
| Compound <b>48</b> | 1.00E-05               | 12.2                           | 25.5 | 18.9 |
| Compound <b>50</b> | 1.00E-05               | 33.1                           | 24.2 | 28.6 |
| Compound <b>53</b> | 1.00E-05               | 17.9                           | 15.8 | 16.9 |
| Ketoconazole       | 3.00E-09               |                                |      | 1.0  |
| Ketoconazole       | 3.00E-08               |                                |      | 11.2 |
| Ketoconazole       | 1.00E-07               |                                |      | 46.6 |
| Ketoconazole       | 3.00E-07               |                                |      | 86.3 |
| Ketoconazole       | 1.00E-06               |                                |      | 95.6 |
| Ketoconazole       | 1.00E-05               |                                |      | 97.9 |

## Full KINOMEscan Binding Profile of Compound 26

Table S3. Full Kinase Binding Profile of Compound 26 from KINOMEscan™ Assay at 100 nM and 1,000 nM.

| KINOMEscan Gene Symbol        | Percent Control (100 nM) | Percent Control (1,000 nM) |
|-------------------------------|--------------------------|----------------------------|
| AAK1                          | 100                      | 97                         |
| ABL1(E255K)-phosphorylated    | 89                       | 89                         |
| ABL1(F317I)-nonphosphorylated | 100                      | 100                        |
| ABL1(F317I)-phosphorylated    | 96                       | 94                         |
| ABL1(F317L)-nonphosphorylated | 100                      | 100                        |
| ABL1(F317L)-phosphorylated    | 88                       | 76                         |
| ABL1(H396P)-nonphosphorylated | 100                      | 100                        |
| ABL1(H396P)-phosphorylated    | 95                       | 82                         |
| ABL1(M351T)-phosphorylated    | 90                       | 87                         |
| ABL1(Q252H)-nonphosphorylated | 100                      | 100                        |
| ABL1(Q252H)-phosphorylated    | 83                       | 68                         |
| ABL1(T315I)-nonphosphorylated | 100                      | 100                        |
| ABL1(T315I)-phosphorylated    | 92                       | 91                         |
| ABL1(Y253F)-phosphorylated    | 95                       | 91                         |
| ABL1-nonphosphorylated        | 90                       | 87                         |
| ABL1-phosphorylated           | 92                       | 87                         |
| ABL2                          | 100                      | 100                        |
| ACVR1                         | 100                      | 95                         |
| ACVR1B                        | 100                      | 100                        |
| ACVR2A                        | 99                       | 100                        |
| ACVR2B                        | 92                       | 76                         |
| ACVRL1                        | 100                      | 97                         |
| ADCK3                         | 93                       | 78                         |
| ADCK4                         | 80                       | 34                         |
| AKT1                          | 100                      | 100                        |
| AKT2                          | 100                      | 100                        |
| AKT3                          | 100                      | 100                        |
| ALK                           | 72                       | 96                         |

|             |     |     |
|-------------|-----|-----|
| ALK(C1156Y) | 100 | 100 |
| ALK(L1196M) | 96  | 100 |
| AMPK-alpha1 | 98  | 100 |
| AMPK-alpha2 | 100 | 100 |
| ANKK1       | 88  | 83  |
| ARK5        | 100 | 100 |
| ASK1        | 100 | 100 |
| ASK2        | 97  | 94  |
| AURKA       | 84  | 90  |
| AURKB       | 80  | 81  |
| AURKC       | 95  | 100 |
| AXL         | 98  | 100 |
| BIKE        | 99  | 100 |
| BLK         | 100 | 100 |
| BMPR1A      | 100 | 100 |
| BMPR1B      | 80  | 88  |
| BMPR2       | 89  | 98  |
| BMX         | 90  | 88  |
| BRAF        | 83  | 66  |
| BRAF(V600E) | 81  | 60  |
| BRK         | 100 | 99  |
| BRSK1       | 100 | 100 |
| BRSK2       | 84  | 81  |
| BTK         | 83  | 84  |
| BUB1        | 83  | 49  |
| CAMK1       | 93  | 84  |
| CAMK1B      | 79  | 91  |
| CAMK1D      | 100 | 98  |
| CAMK1G      | 99  | 100 |
| CAMK2A      | 100 | 100 |
| CAMK2B      | 100 | 100 |

|               |     |     |
|---------------|-----|-----|
| CAMK2D        | 100 | 100 |
| CAMK2G        | 100 | 93  |
| CAMK4         | 96  | 96  |
| CAMKK1        | 100 | 83  |
| CAMKK2        | 100 | 90  |
| CASK          | 94  | 100 |
| CDC2L1        | 100 | 83  |
| CDC2L2        | 90  | 67  |
| CDC2L5        | 77  | 91  |
| CDK11         | 97  | 100 |
| CDK2          | 97  | 100 |
| CDK3          | 98  | 95  |
| CDK4          | 96  | 99  |
| CDK4-cyclinD1 | 96  | 97  |
| CDK4-cyclinD3 | 100 | 100 |
| CDK5          | 100 | 100 |
| CDK7          | 100 | 100 |
| CDK8          | 97  | 100 |
| CDK9          | 100 | 100 |
| CDKL1         | 100 | 98  |
| CDKL2         | 100 | 87  |
| CDKL3         | 92  | 100 |
| CDKL5         | 86  | 83  |
| CHEK1         | 100 | 100 |
| CHEK2         | 100 | 94  |
| CIT           | 71  | 7.8 |
| CLK1          | 86  | 90  |
| CLK2          | 100 | 100 |
| CLK3          | 93  | 98  |
| CLK4          | 100 | 100 |
| CSF1R         | 99  | 94  |

|                     |     |     |
|---------------------|-----|-----|
| CSF1R-autoinhibited | 92  | 100 |
| CSK                 | 100 | 100 |
| CSNK1A1             | 36  | 2.1 |
| CSNK1A1L            | 90  | 49  |
| CSNK1D              | 3.1 | 2.3 |
| CSNK1E              | 1.8 | 0.1 |
| CSNK1G1             | 88  | 55  |
| CSNK1G2             | 98  | 34  |
| CSNK1G3             | 80  | 26  |
| CSNK2A1             | 79  | 89  |
| CSNK2A2             | 88  | 87  |
| CTK                 | 87  | 95  |
| DAPK1               | 92  | 96  |
| DAPK2               | 100 | 93  |
| DAPK3               | 100 | 100 |
| DCAMKL1             | 74  | 78  |
| DCAMKL2             | 92  | 92  |
| DCAMKL3             | 97  | 100 |
| DDR1                | 50  | 2.8 |
| DDR2                | 49  | 14  |
| DLK                 | 92  | 97  |
| DMPK                | 100 | 94  |
| DMPK2               | 67  | 20  |
| DRAK1               | 97  | 88  |
| DRAK2               | 99  | 92  |
| DYRK1A              | 92  | 95  |
| DYRK1B              | 70  | 100 |
| DYRK2               | 76  | 83  |
| EGFR                | 90  | 76  |
| EGFR(E746-A750del)  | 76  | 74  |
| EGFR(G719C)         | 100 | 91  |

|                          |     |     |
|--------------------------|-----|-----|
| EGFR(G719S)              | 100 | 95  |
| EGFR(L747-E749del_A750P) | 91  | 81  |
| EGFR(L747-S752del_P753S) | 67  | 65  |
| EGFR(L747-T751del_Sins)  | 100 | 89  |
| EGFR(L858R)              | 88  | 60  |
| EGFR(L858R_T790M)        | 72  | 47  |
| EGFR(L861Q)              | 100 | 92  |
| EGFR(S752-I759del)       | 98  | 90  |
| EGFR(T790M)              | 96  | 67  |
| EIF2AK1                  | 100 | 99  |
| EPHA1                    | 93  | 97  |
| EPHA2                    | 100 | 91  |
| EPHA3                    | 92  | 73  |
| EPHA4                    | 100 | 95  |
| EPHA5                    | 100 | 100 |
| EPHA6                    | 100 | 86  |
| EPHA7                    | 93  | 100 |
| EPHA8                    | 95  | 100 |
| EPHB1                    | 100 | 100 |
| EPHB2                    | 88  | 100 |
| EPHB3                    | 100 | 96  |
| EPHB4                    | 100 | 97  |
| EPHB6                    | 100 | 93  |
| ERBB2                    | 92  | 87  |
| ERBB3                    | 78  | 75  |
| ERBB4                    | 82  | 73  |
| ERK1                     | 100 | 100 |
| ERK2                     | 100 | 100 |
| ERK3                     | 76  | 84  |
| ERK4                     | 57  | 56  |
| ERK5                     | 97  | 94  |

|                       |     |     |
|-----------------------|-----|-----|
| ERK8                  | 94  | 97  |
| ERN1                  | 87  | 86  |
| FAK                   | 94  | 99  |
| FER                   | 92  | 95  |
| FES                   | 100 | 100 |
| FGFR1                 | 94  | 93  |
| FGFR2                 | 88  | 91  |
| FGFR3                 | 99  | 96  |
| FGFR3(G697C)          | 96  | 95  |
| FGFR4                 | 100 | 96  |
| FGR                   | 100 | 100 |
| FLT1                  | 93  | 99  |
| FLT3                  | 86  | 95  |
| FLT3(D835H)           | 97  | 97  |
| FLT3(D835V)           | 76  | 94  |
| FLT3(D835Y)           | 100 | 100 |
| FLT3(ITD)             | 92  | 96  |
| FLT3(ITD_D835V)       | 66  | 74  |
| FLT3(ITD_F691L)       | 47  | 48  |
| FLT3(K663Q)           | 96  | 100 |
| FLT3(N841I)           | 100 | 90  |
| FLT3(R834Q)           | 100 | 100 |
| FLT3-autoinhibited    | 94  | 90  |
| FLT4                  | 95  | 98  |
| FRK                   | 96  | 85  |
| FYN                   | 98  | 92  |
| GAK                   | 40  | 15  |
| GCN2(Kin.Dom.2_S808G) | 97  | 100 |
| GRK1                  | 89  | 80  |
| GRK2                  | 45  | 43  |
| GRK3                  | 100 | 100 |

|                              |     |      |
|------------------------------|-----|------|
| GRK4                         | 89  | 99   |
| GRK7                         | 98  | 89   |
| GSK3A                        | 95  | 83   |
| GSK3B                        | 80  | 83   |
| HASPIN                       | 96  | 100  |
| HCK                          | 100 | 91   |
| HIPK1                        | 94  | 89   |
| HIPK2                        | 88  | 87   |
| HIPK3                        | 85  | 87   |
| HIPK4                        | 100 | 100  |
| HPK1                         | 95  | 100  |
| HUNK                         | 100 | 100  |
| ICK                          | 81  | 73   |
| IGF1R                        | 100 | 100  |
| IKK-alpha                    | 83  | 90   |
| IKK-beta                     | 92  | 99   |
| IKK-epsilon                  | 92  | 91   |
| INSR                         | 96  | 87   |
| INSRR                        | 100 | 100  |
| IRAK1                        | 100 | 98   |
| IRAK3                        | 82  | 98   |
| IRAK4                        | 70  | 94   |
| ITK                          | 97  | 100  |
| JAK1(JH1domain-catalytic)    | 100 | 98   |
| JAK1(JH2domain-pseudokinase) | 64  | 52   |
| JAK2(JH1domain-catalytic)    | 93  | 85   |
| JAK3(JH1domain-catalytic)    | 81  | 93   |
| JNK1                         | 12  | 0.35 |
| JNK2                         | 0.4 | 0.1  |
| JNK3                         | 0.7 | 0.05 |
| KIT                          | 95  | 100  |

|                   |     |     |
|-------------------|-----|-----|
| KIT(A829P)        | 92  | 100 |
| KIT(D816H)        | 55  | 52  |
| KIT(D816V)        | 92  | 97  |
| KIT(L576P)        | 92  | 95  |
| KIT(V559D)        | 92  | 96  |
| KIT(V559D_T670I)  | 96  | 94  |
| KIT(V559D_V654A)  | 97  | 86  |
| KIT-autoinhibited | 92  | 91  |
| LATS1             | 100 | 100 |
| LATS2             | 93  | 88  |
| LCK               | 94  | 96  |
| LIMK1             | 100 | 98  |
| LIMK2             | 71  | 80  |
| LKB1              | 83  | 100 |
| LOK               | 96  | 96  |
| LRRK2             | 100 | 84  |
| LRRK2(G2019S)     | 88  | 99  |
| LTK               | 100 | 97  |
| LYN               | 97  | 98  |
| LZK               | 78  | 87  |
| MAK               | 94  | 100 |
| MAP3K1            | 89  | 100 |
| MAP3K15           | 66  | 95  |
| MAP3K2            | 88  | 86  |
| MAP3K3            | 98  | 77  |
| MAP3K4            | 91  | 96  |
| MAP4K2            | 98  | 100 |
| MAP4K3            | 98  | 100 |
| MAP4K4            | 96  | 54  |
| MAP4K5            | 100 | 99  |
| MAPKAPK2          | 93  | 93  |

|             |     |     |
|-------------|-----|-----|
| MAPKAPK5    | 90  | 100 |
| MARK1       | 89  | 100 |
| MARK2       | 98  | 83  |
| MARK3       | 100 | 99  |
| MARK4       | 86  | 93  |
| MAST1       | 90  | 100 |
| MEK1        | 65  | 82  |
| MEK2        | 70  | 80  |
| MEK3        | 80  | 88  |
| MEK4        | 100 | 88  |
| MEK5        | 71  | 63  |
| MEK6        | 100 | 98  |
| MELK        | 100 | 100 |
| MERTK       | 97  | 100 |
| MET         | 100 | 100 |
| MET(M1250T) | 100 | 100 |
| MET(Y1235D) | 100 | 97  |
| MINK        | 70  | 32  |
| MKK7        | 89  | 75  |
| MKNK1       | 97  | 83  |
| MKNK2       | 100 | 90  |
| MLCK        | 91  | 79  |
| MLK1        | 100 | 100 |
| MLK2        | 98  | 90  |
| MLK3        | 100 | 99  |
| MRCKA       | 100 | 77  |
| MRCKB       | 96  | 86  |
| MST1        | 100 | 94  |
| MST1R       | 100 | 100 |
| MST2        | 83  | 89  |
| MST3        | 100 | 72  |

|           |     |     |
|-----------|-----|-----|
| MST4      | 100 | 100 |
| MTOR      | 73  | 87  |
| MUSK      | 100 | 100 |
| MYLK      | 95  | 96  |
| MYLK2     | 100 | 100 |
| MYLK4     | 100 | 94  |
| MYO3A     | 100 | 94  |
| MYO3B     | 100 | 100 |
| NDR1      | 100 | 83  |
| NDR2      | 100 | 99  |
| NEK1      | 100 | 100 |
| NEK10     | 55  | 60  |
| NEK11     | 87  | 95  |
| NEK2      | 100 | 100 |
| NEK3      | 77  | 75  |
| NEK4      | 91  | 100 |
| NEK5      | 84  | 86  |
| NEK6      | 100 | 100 |
| NEK7      | 100 | 100 |
| NEK9      | 100 | 100 |
| NIK       | 85  | 92  |
| NIM1      | 58  | 66  |
| NLK       | 29  | 9.3 |
| OSR1      | 95  | 90  |
| p38-alpha | 0.1 | 0   |
| p38-beta  | 34  | 1.2 |
| p38-delta | 90  | 90  |
| p38-gamma | 92  | 84  |
| PAK1      | 95  | 94  |
| PAK2      | 98  | 96  |
| PAK3      | 73  | 78  |

|                       |     |     |
|-----------------------|-----|-----|
| PAK4                  | 94  | 88  |
| PAK6                  | 98  | 98  |
| PAK7                  | 88  | 90  |
| PCTK1                 | 89  | 97  |
| PCTK2                 | 94  | 90  |
| PCTK3                 | 85  | 88  |
| PDGFRA                | 100 | 100 |
| PDGFRB                | 92  | 93  |
| PDPK1                 | 100 | 100 |
| PFCDPK1(P.falciparum) | 66  | 49  |
| PFPK5(P.falciparum)   | 83  | 98  |
| PFTAIRE2              | 100 | 100 |
| PFTK1                 | 94  | 95  |
| PHKG1                 | 93  | 95  |
| PHKG2                 | 98  | 100 |
| PIK3C2B               | 97  | 82  |
| PIK3C2G               | 81  | 78  |
| PIK3CA                | 90  | 86  |
| PIK3CA(C420R)         | 94  | 93  |
| PIK3CA(E542K)         | 86  | 83  |
| PIK3CA(E545A)         | 92  | 93  |
| PIK3CA(E545K)         | 71  | 69  |
| PIK3CA(H1047L)        | 77  | 73  |
| PIK3CA(H1047Y)        | 100 | 100 |
| PIK3CA(I800L)         | 91  | 78  |
| PIK3CA(M1043I)        | 100 | 100 |
| PIK3CA(Q546K)         | 72  | 70  |
| PIK3CB                | 86  | 83  |
| PIK3CD                | 84  | 91  |
| PIK3CG                | 99  | 94  |
| PIK4CB                | 77  | 72  |

|                      |     |     |
|----------------------|-----|-----|
| PIKFYVE              | 84  | 95  |
| PIM1                 | 89  | 95  |
| PIM2                 | 99  | 100 |
| PIM3                 | 99  | 100 |
| PIP5K1A              | 100 | 100 |
| PIP5K1C              | 90  | 91  |
| PIP5K2B              | 100 | 100 |
| PIP5K2C              | 78  | 87  |
| PKAC-alpha           | 100 | 100 |
| PKAC-beta            | 96  | 94  |
| PKMYT1               | 92  | 85  |
| PKN1                 | 100 | 100 |
| PKN2                 | 100 | 86  |
| PKNB(M.tuberculosis) | 86  | 81  |
| PLK1                 | 91  | 79  |
| PLK2                 | 78  | 82  |
| PLK3                 | 74  | 76  |
| PLK4                 | 94  | 92  |
| PRKCD                | 95  | 100 |
| PRKCE                | 67  | 80  |
| PRKCH                | 100 | 96  |
| PRKCI                | 100 | 97  |
| PRKCQ                | 100 | 100 |
| PRKD1                | 95  | 63  |
| PRKD2                | 100 | 100 |
| PRKD3                | 99  | 91  |
| PRKG1                | 94  | 100 |
| PRKG2                | 96  | 92  |
| PRKR                 | 91  | 94  |
| PRKX                 | 96  | 96  |
| PRP4                 | 100 | 100 |

|                               |     |     |
|-------------------------------|-----|-----|
| PYK2                          | 99  | 86  |
| QSK                           | 88  | 91  |
| RAF1                          | 100 | 97  |
| RET                           | 89  | 95  |
| RET(M918T)                    | 100 | 97  |
| RET(V804L)                    | 100 | 100 |
| RET(V804M)                    | 100 | 100 |
| RIOK1                         | 100 | 100 |
| RIOK2                         | 99  | 95  |
| RIOK3                         | 100 | 100 |
| RIPK1                         | 73  | 79  |
| RIPK2                         | 51  | 18  |
| RIPK4                         | 60  | 56  |
| RIPK5                         | 75  | 64  |
| ROCK1                         | 98  | 100 |
| ROCK2                         | 94  | 100 |
| ROS1                          | 98  | 100 |
| RPS6KA4(Kin.Dom.1-N-terminal) | 100 | 100 |
| RPS6KA4(Kin.Dom.2-C-terminal) | 65  | 72  |
| RPS6KA5(Kin.Dom.1-N-terminal) | 100 | 99  |
| RPS6KA5(Kin.Dom.2-C-terminal) | 100 | 100 |
| RSK1(Kin.Dom.1-N-terminal)    | 98  | 90  |
| RSK1(Kin.Dom.2-C-terminal)    | 85  | 62  |
| RSK2(Kin.Dom.1-N-terminal)    | 90  | 76  |
| RSK2(Kin.Dom.2-C-terminal)    | 86  | 100 |
| RSK3(Kin.Dom.1-N-terminal)    | 92  | 100 |
| RSK3(Kin.Dom.2-C-terminal)    | 100 | 67  |
| RSK4(Kin.Dom.1-N-terminal)    | 98  | 99  |
| RSK4(Kin.Dom.2-C-terminal)    | 100 | 22  |
| S6K1                          | 83  | 87  |
| SBK1                          | 94  | 92  |

|        |     |     |
|--------|-----|-----|
| SGK    | 76  | 77  |
| SGK2   | 74  | 95  |
| SGK3   | 99  | 97  |
| SIK    | 100 | 100 |
| SIK2   | 97  | 82  |
| SLK    | 98  | 95  |
| SNARK  | 96  | 84  |
| SNRK   | 100 | 100 |
| SRC    | 100 | 100 |
| SRMS   | 89  | 97  |
| SRPK1  | 94  | 77  |
| SRPK2  | 100 | 90  |
| SRPK3  | 86  | 87  |
| STK16  | 98  | 92  |
| STK33  | 100 | 100 |
| STK35  | 100 | 100 |
| STK36  | 100 | 58  |
| STK39  | 86  | 91  |
| SYK    | 97  | 88  |
| SgK110 | 94  | 90  |
| TAK1   | 95  | 81  |
| TAOK1  | 83  | 37  |
| TAOK2  | 93  | 89  |
| TAOK3  | 87  | 72  |
| TBK1   | 100 | 96  |
| TEC    | 100 | 100 |
| TESK1  | 81  | 88  |
| TGFBR1 | 100 | 99  |
| TGFBR2 | 100 | 88  |
| TIE1   | 95  | 100 |
| TIE2   | 100 | 100 |

|                              |     |     |
|------------------------------|-----|-----|
| TLK1                         | 98  | 100 |
| TLK2                         | 79  | 77  |
| TNIK                         | 87  | 23  |
| TNK1                         | 100 | 91  |
| TNK2                         | 94  | 95  |
| TNNI3K                       | 98  | 81  |
| TRKA                         | 75  | 75  |
| TRKB                         | 76  | 58  |
| TRKC                         | 72  | 68  |
| TRPM6                        | 83  | 100 |
| TSSK1B                       | 100 | 100 |
| TSSK3                        | 100 | 100 |
| TTK                          | 76  | 62  |
| TXK                          | 93  | 91  |
| TYK2(JH1domain-catalytic)    | 79  | 100 |
| TYK2(JH2domain-pseudokinase) | 76  | 78  |
| TYRO3                        | 94  | 99  |
| ULK1                         | 98  | 91  |
| ULK2                         | 73  | 100 |
| ULK3                         | 78  | 76  |
| VEGFR2                       | 82  | 72  |
| VPS34                        | 77  | 88  |
| VRK2                         | 82  | 52  |
| WEE1                         | 92  | 100 |
| WEE2                         | 100 | 100 |
| WNK1                         | 79  | 93  |
| WNK2                         | 71  | 78  |
| WNK3                         | 79  | 86  |
| WNK4                         | 78  | 96  |
| YANK1                        | 100 | 53  |
| YANK2                        | 100 | 61  |

|       |     |     |
|-------|-----|-----|
| YANK3 | 90  | 97  |
| YES   | 92  | 99  |
| YSK1  | 94  | 89  |
| YSK4  | 99  | 96  |
| ZAK   | 96  | 78  |
| ZAP70 | 100 | 100 |
